# A novel computational method for head-to-tail peptide cyclization: application to urotensin II

Yasaman Karami<sup>1</sup>, Samuel Murail<sup>1</sup>, Julien Giribaldi<sup>2</sup>, Benjamin Lefranc<sup>3</sup>, Jérôme Leprince<sup>3</sup>, Sjoerd J. de Vries<sup>1,\*</sup>, Pierre Tufféry<sup>1,\*</sup>

<sup>1</sup> Université de Paris, CNRS UMR 8251, INSERM ERL U1133, Paris, France.

<sup>2</sup> Institut des Biomolécules Max Mousseron, UMR 5247, Université de Montpellier-CNRS, 34095 Montpellier, France.

<sup>3</sup> Normandie Université, UNIROUEN, INSERM U1239, Neuronal and Neuroendocrine Differentiation and Communication, PRIMACEN, Rouen, France.

\* corresponding authors: [sjoerd.de-vries@inserm.fr](mailto:sjoerd.de-vries@inserm.fr), [pierre.tuffery@univ-paris-diderot.fr](mailto:pierre.tuffery@univ-paris-diderot.fr)

## Abstract

Peptides have recently re-gained interest as therapeutic candidates but their development remains confronted with several limitations including low bioavailability. Backbone head-to-tail cyclization is one effective strategy of peptide-based drug design to stabilize the conformation of bioactive peptides while preserving peptide properties in terms of low toxicity, binding affinity, target selectivity and preventing enzymatic degradation. However, very little is known about the sequence-structure relationship requirements of designing linkers for peptide cyclization in a rational manner. Recently, we have shown that large scale data-mining of available protein structures can lead to the precise identification of protein loop conformations, even from remote structural classes. Here, we transpose this approach to head-to-tail peptide cyclization. Firstly we show that given a linker sequence and the conformation of the linear peptide, it is possible to accurately predict the cyclized peptide conformation improving by over 1 Å over pre-existing protocols. Secondly, and more importantly, we show that it is possible to elaborate on the information inferred from protein structures to propose effective candidate linker sequences constrained by length and amino acid composition, providing the first framework for the rational peptide head-to-tail cyclization. As functional validation, we apply it to the design of a head-to-tail cyclized derivative of urotensin II, an 11-residue long peptide which exerts a broad array of biologic activities, making its cognate receptor a valuable and innovative therapeutic or diagnostic target. We propose a three amino acid candidate linker, leading to the first synthesized 14-residue long cyclic UII analogue with excellent retention of in vitro activity.

## Introduction

Several naturally occurring cyclic peptides constitute alternatives to antibiotics and peptide backbone cyclization is frequently used in peptide-based drug design to convey druggable properties to linear bioactive sequences [1, 2]. Peptides in general combine high affinity with high target selectivity and low toxicity, and are a natural choice in the targeting of protein-protein interactions. While preserving these favorable properties, peptide cyclization additionally confers peptides with more rigid conformation and enhanced stability towards enzymatic proteolysis and improves the permeability through biological barriers [3–7]. Moreover, many natural-occurring cyclic peptides are known from different kingdoms of organisms, exhibiting diverse biological activities, including anti-tumor [8, 9], antimicrobial [10, 11] and antihelminthic activities [12–14]. Together, this has caused a growing interest toward cyclic peptides, thus the number of designed cyclic peptide drugs is growing [15].

37 When designing new cyclic peptides, there are broadly two strategies that can be followed: *i*) de novo design, or *ii*)  
38 cyclization of an existing peptide. For the first strategy, a number of experimental techniques are available, such as  
39 SICLOPPS [16], phage display, and mRNA display [17]. These are all based on libraries of random cyclic peptides  
40 that are subjected to *in vitro* selection. They can be complemented with library-based computational approaches such  
41 as from Slough et al. [18], CAESAR [19], Omega [20] and CycloPs [21] based on rdkit ([https://github.com/rdkit/  
42 rdkit](https://github.com/rdkit/rdkit)). Those approaches are conceptually similar to the molecular modeling of small ligands, with the corresponding  
43 strengths (arbitrary molecular topologies) and weaknesses (limited number of flexible bonds). For computational de  
44 novo design, an alternative approach is to perform peptide structure prediction, using one of the many fragment-based  
45 methods that are available, such as PLOP [22, 23], Peplook [24, 25], PEPstrMOD [26] or PEP-FOLD [27, 28], while  
46 imposing cyclization as a bond or distance restraint (see [29] for a review). Since these methods leverage the existing  
47 wealth of knowledge of protein and peptide structure, they can deal with larger peptides, but have difficulties where  
48 this knowledge falls short, *i.e.*, for unnatural amino acids.

49 For the second strategy, the starting point is an existing linear peptide of known structure. It is well established  
50 that small linear peptides generally exist in solution in an interchangeable conformational equilibrium. This flexibility  
51 provides to bioactive peptides the ability to interact with several types or subtypes of receptors for instance. Stabilizing  
52 a bioactive conformation is a challenge that can be tackled by a variety of cyclization strategies. On the one hand,  
53 this can be as straightforward as mutating two spatially close residues into cysteins with the aim of introducing a  
54 disulfide bond. On the other hand, sophisticated chemical scaffolds or cyclotides can be used for the grafting or  
55 stitching of peptides or cyclotides into rigid bioactive conformations [30, 31]. One particular successful strategy has  
56 been head-to-tail peptide backbone cyclization [32–41]. This involves the design of a sequence that links the N- and  
57 C-terminal extremities of the peptide. In principle, any amino acid can be part of the linker sequence, but Gly, Ala  
58 and Pro residues are often favored because they are small and their side chains cannot form hydrogen bonds, which  
59 could potentially disrupt the bioactive conformation.

60 Head-to-tail cyclization leads to cyclic peptides with improved pharmacological properties (affinity, potency, effi-  
61 ciency, selectivity) when compatible with target specificity (or bioactivity conservation). Whether the cyclic peptide is  
62 active or not, it is generally less sensitive to metabolic degradation. However, cyclization is often unsuccessful due to  
63 imposed conformational restriction that is too strict and too far from the bioactive structure. In order to avoid this,  
64 it is necessary to understand the general sequence-structure requirements; in particular: what is the allowed sequence  
65 space of the linker, and what will be the structure of the cyclized peptide? This is a challenging issue, and to the best of  
66 our knowledge, there is only one computational protocol that has been successfully applied to head-to-tail cyclization  
67 linker design, namely the Rosetta protocol used by Bhardwaj et al. [6]. However, in that study, the sequence and  
68 structure of the entire cyclic peptide were designed from scratch. Otherwise, we are not aware of any computational  
69 methods that can predict the sequence and structure of a head-to-tail cyclization linker, while preserving the sequence  
70 and structure of the linear peptide that is being cyclized.

71 Recently, we have developed DaReUS-Loop [42, 43], a fast data-based approach that identifies loop candidates  
72 mining the complete set of available experimental protein structures. This is done by treating the loop as a gap  
73 in the structure, and considering the flanking regions of the structure immediately before and after the gap. Loop  
74 candidates are then favored that *i*) superimpose well onto the flanks, and *ii*) have a compatible sequence. Recognizing  
75 the conceptual similarity, we have now developed PEP-Cyclizer, a method that extends the DaReUS-Loop approach  
76 and applies it to rational head-to-tail peptide cyclization. This method provides two complementary possibilities: *i*)  
77 given a sequence for the cyclization linker, PEP-Cyclizer can predict structural models for the cyclized peptide, *ii*)  
78 PEP-Cyclizer can propose candidate cyclization linker sequences, constrained by length and amino acid composition.  
79 PEP-Cyclizer is the first method that can propose the sequence or the structure of a head-to-tail cyclized peptide,  
80 starting from the linear peptide structure. For structure prediction, PEP-Cyclizer was validated on a benchmark of

81 five cyclic conotoxin structures for which a linear structure is available as well. With regard to the experimental  
82 structures, the predicted cyclized peptide models had a root-mean-square deviation (RMSD) of 2.0 Å (3.2 Å) for the  
83 top 20 (top 1) models, an improvement of more than 1 Å over the Rosetta Next-generation KIC (NGK) protocol [44],  
84 a high-resolution Rosetta protocol for the modelling of missing regions. For sequence prediction, PEP-Cyclizer was  
85 validated on the same benchmark and in result, experimental sequences were ranked significantly better than other  
86 sequences of the same length and composition.

87 As a functional validation, PEP-Cyclizer was used to design a cyclized peptide sequence of the human urotensin  
88 II (UII), that is an 11-residue long disulfide-bridged peptide [45]. UII exerts a broad array of biological activities, in  
89 particular in the central nervous system, the cardiovascular system, and the kidney. It has been suggested that the  
90 cognate receptor of UII (UT), may emerge as a valuable and innovative therapeutic or diagnostic target [46]. Indeed,  
91 high affinity, potent and selective UT peptide ligands have been designed, from structure-activity relationship studies  
92 [47] to further elucidate the pharmacology and biology of UII towards new therapeutic opportunities, such as the  
93 treatment of sepsis-induced lung damage [48]. In this context, introduction of a main conformational restraint through  
94 head-to-tail cyclisation has become a standard strategy to improve pharmacological profile of peptide ligands [49]. The  
95 NMR structure of the disulfide-bridged core of UII is well-defined, whereas the flanking linear extremities are very  
96 flexible [50–53]. Depending on the experimental environment (water or membrane mimetic micelles) and temperature,  
97 distinct conformations are stabilized within the disulfide-bridged core involving different sets of intramolecular hydrogen  
98 bonds. Here, using a linker predicted by PEP-Cyclizer, a head-to-tail cyclized UII peptide was synthesized and its  
99 activity validated, proposing the first bicyclic active UII analogue.

## 100 Results

101 PEP-Cyclizer considers all cyclization linker candidate structures that are compatible with the flanks of the uncyclized  
102 peptide structure. The sequences of these linker candidates, potentially filtered by *a priori* sequence constraints, are  
103 then used to build a linker sequence profile. This profile feeds a Hidden Markov Model from which it is possible to  
104 estimate the likelihood of candidate linkers using a forward-backtrack algorithm. Alternatively, if the linker candidates  
105 are restricted to one known linker sequence, they are clustered and superimposed onto the flanks, providing structural  
106 models of the cyclized peptide. **Figure 1** depicts the workflow of the method.

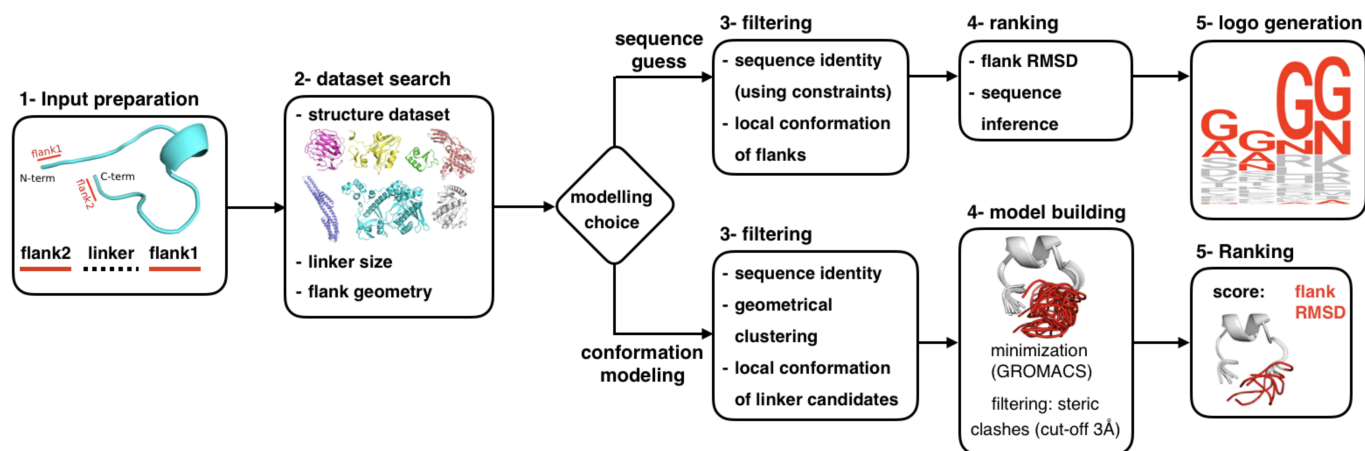

Figure 1: **The workflow of PEP-Cyclizer.** The workflow describes main steps for peptide head-to-tail cyclization. The method provides two possibilities: proposing candidate sequences for the linker, or modelling the 3D conformation. The steps of the workflow are: input preparation, linker candidate search, candidate filtering, model building, model selection and logo generation in case of sequence prediction. The inputs are a linear peptide and either the amino acid constraints for sequence prediction, or the linker sequence for conformation modelling. In the final step, for conformation modelling, the 20 best models are returned as the final predictions. For sequence prediction a logo is generated and a forward-backtrack algorithm is used to sample the sequence space and assess the likelihood of the candidate linkers. Note that the sequence logo serves strictly as a global visualization of the ensemble of generated sequence candidates, and has no predictive power by itself.

107 As a positive control, PEP-Cyclizer was applied to 64 cyclic peptides from the CyBase database (<http://www.cybase.org.au/>) [54, 55] (see **Table S1** for a complete list of studied peptides). 1147 linear peptides were artificially  
108 generated by removing segments of 2-7 residues from the 64 cyclic peptides, details are reported in **Supplementary**  
109 **Materials - CyBase benchmark**. Unlike a real-world situation, where a peptide may undergo conformational  
110 changes upon cyclization, these artificial linear peptides represent perfect conformations for modelling the removed  
111 linker conformation. For all linker sizes, PEP-Cyclizer was able to produce accurate models of the local linker con-  
112 formation, with an average accuracy of 1 Å or better. This is comparable (although not fully equal in accuracy) to  
113 models obtained for the same peptides using Rosetta NGK (comparisons reported per peptide and linker size in **Table**  
114 **S2** and **S3**, respectively).  
115

116 PEP-Cyclizer was then applied to a small benchmark of real-world cases, in the form of several conotoxin peptides  
117 where both cyclized and non-cyclized structures are available in the PDB. Seven distinct cyclized/non-cyclized pairs of  
118 peptide structures were identified (**Table 3** and **S4**). The range of backbone RMSD between the overlapping region of  
119 cyclized and uncyclized forms is 0.4-2.5Å. Using the known linker sequence, only the non-cyclized structure was used  
120 to model the linker. In this case, PEP-Cyclizer was able to return a model approximating the global structure of the  
121 linker at 2.01Å on average (1.01Å for the local linker conformation), as reported in **Table 1**. This is a considerable  
122 improvement over Rosetta NGK (3.48Å), which suffers from the structural imprecisions caused by conformational  
123 change upon cyclization. In contrast, our results show PEP-Cyclizer to be rather robust against such imprecisions.  
124 **Figure 2** illustrates the results for the best predictions - out of the top 20 - of PEP-Cyclizer (in green) and Rosetta  
125 NGK (in cyan), starting from the first NMR conformation of each uncyclized peptide.

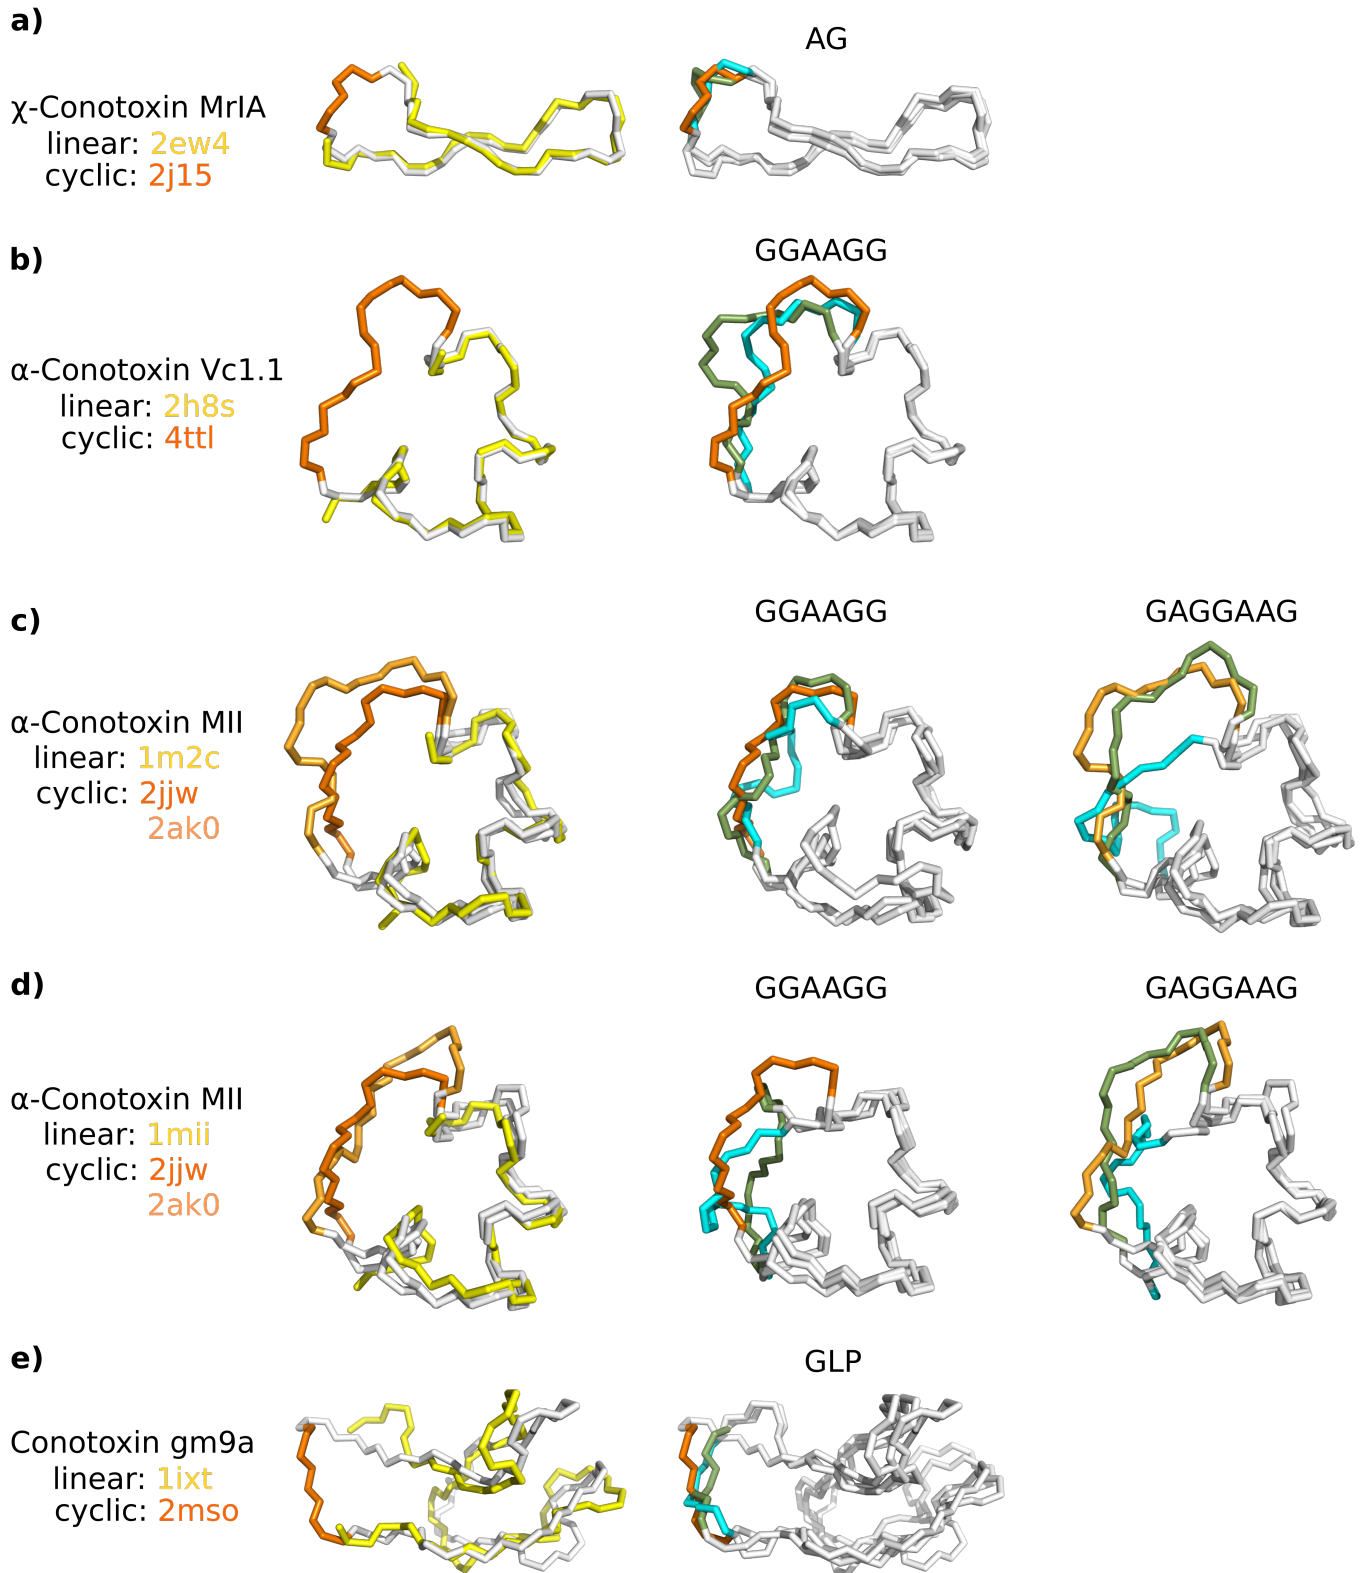

Figure 2: **Structure of the studied linear Conotoxins and their corresponding engineered cyclic peptides.** The native linear and cyclic peptides are shown at the left column, colored in yellow and orange, respectively. The structures on the middle and right columns, represent the comparison between the native linker (in orange), linkers modelled by PEP-Cyclizer (in green) and Rosetta NGK (in cyan). See **Table 1** for the corresponding  $gRMSD_{20}$  (and  $lRMSD_{20}$ ) values. The corresponding linker sequences are reported for every model, at the top.

| Name                 | lsz | $N_{model}$ | PEP-Cyclizer   |                |             |             | Rosetta NGK    |                |             |             |
|----------------------|-----|-------------|----------------|----------------|-------------|-------------|----------------|----------------|-------------|-------------|
|                      |     |             | $lRMSD_{20}^*$ | $gRMSD_{20}^*$ | $lRMSD_1^*$ | $gRMSD_1^*$ | $lRMSD_{20}^*$ | $gRMSD_{20}^*$ | $lRMSD_1^*$ | $gRMSD_1^*$ |
| 2ew4                 | 2   | 20          | 0.47±0.13      | 2.03±0.84      | 0.67±0.18   | 3.57±1.35   | 0.31±0.22      | 2.53±1.25      | 0.39±0.26   | 3.10±1.25   |
| 1ixt                 | 3   | 20          | 0.46±0.08      | 2.31±0.25      | 1.43±0.35   | 3.52±1.50   | 0.37±0.14      | 2.81±0.54      | 0.43±0.14   | 3.08±0.66   |
| 1m2c                 | 6   | 14          | 1.31±0.15      | 1.99±0.16      | 1.66±0.12   | 2.58±0.57   | 1.33±0.17      | 4.58±0.90      | 1.53±0.16   | 6.08±1.53   |
| 1mii <sup>+</sup>    | 6   | 20          | 1.35±0.01      | 1.72±0.01      | 1.75±0.50   | 3.11±1.74   | 1.56±0.11      | 5.76±0.55      | 1.72±0.12   | 7.22±0.45   |
| 2h8s                 | 6   | 20          | 1.24±0.12      | 2.12±0.10      | 2.03±0.29   | 4.05±1.21   | 1.30±0.19      | 3.01±0.53      | 1.60±0.21   | 3.81±0.64   |
| 1m2c                 | 7   | 14          | 1.59±0.16      | 1.97±0.25      | 2.09±0.56   | 3.66±1.56   | 1.84±0.37      | 5.34±1.30      | 2.12±0.26   | 6.53±1.29   |
| 1mii <sup>+</sup>    | 7   | 20          | 1.51±0.08      | 1.89±0.06      | 1.69±0.01   | 2.30±0.02   | 1.56±0.03      | 5.51±0.72      | 1.64±0.06   | 7.80±0.67   |
| average <sup>+</sup> |     |             | 1.01±0.46      | 2.01±0.43      | 1.49±0.52   | 3.24±1.26   | 0.95±0.63      | 3.48±1.39      | 1.13±0.71   | 4.28±1.77   |

**Table 1: Comparison of RMSD values for the predicted linkers using all the NMR models of the linear peptides.** For each peptide we report the average local and global RMSD values over the top 1 ( $lRMSD_1^*$  and  $gRMSD_1^*$ ) and best out of top 20 predictions ( $lRMSD_{20}^*$  and  $gRMSD_{20}^*$ ). The average values are measured over all  $N_{uncyclized}$  NMR conformations of each linear peptide (see **Methods**). The RMSD values are calculated over the backbone atoms (N, C,  $C\alpha$  and O). <sup>+</sup>The structure of 1mii and 1m2c correspond to the same protein ( $\alpha$ -Conotoxin MII), and to avoid redundancies in reported values, we measured the average considering the best predictions between 1m2c and 1mii for each method.

126 Next, the ability of PEP-Cyclizer to propose peptide linker sequences was tested. The same conotoxin benchmark  
 127 was used, adding ten cyclic sequences with available structures for the uncyclized but not the cyclized peptide, for  
 128 a total of seventeen sequences. The details of the peptides are reported in **Tables 3** and **S4**. As potential linker  
 129 sequences, all combinations of all amino acids that are present in the experimental linker sequence (typically only  
 130 Gly and Ala) were considered, and ranked by the forward-backtrack algorithm. The results are shown in **Figure 3**.  
 131 The experimental sequences were ranked significantly better (average percentile: 37.4,  $p=0.025$ ) than other potential  
 132 sequences.

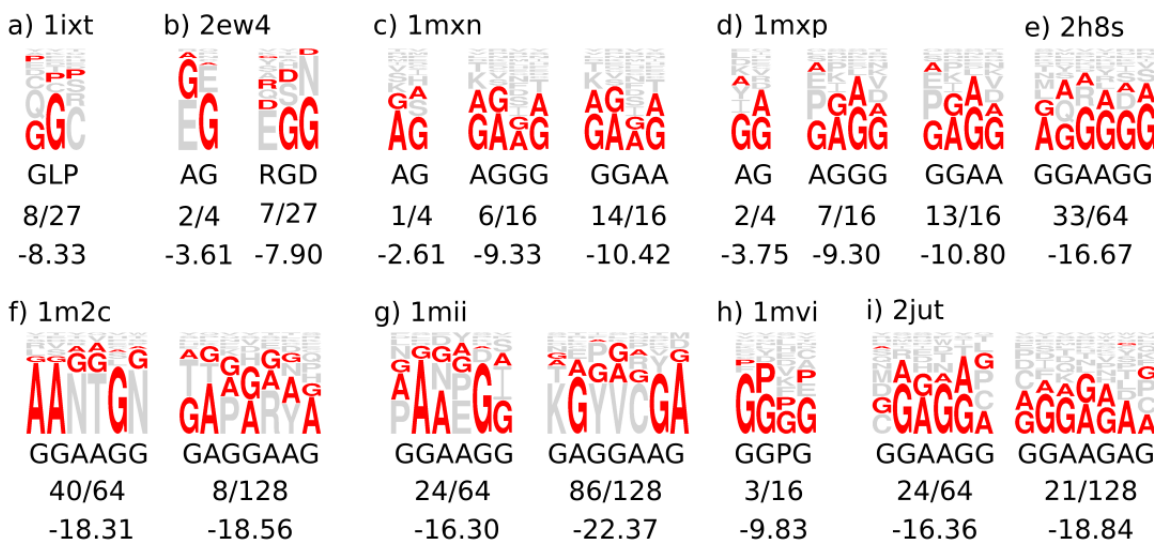

**Figure 3: Sequence logo generated by PEP-Cyclizer for the studied cases.** The pdb code of the linear peptides used as input are reported for each case. Below every logo, the desired linker sequence, its rank and score among the proposed sequences by the forward-backtrack algorithm are reported.

## 133 Application to urotensin II

134 Finally, PEP-Cyclizer was applied to predict a head-to-tail cyclization linker sequence for UII. So far, only the structures  
135 of a fragment corresponding to the eight last amino acids of UII and its N-methylated tryptophan counterpart, [(N-  
136 Me)Trp<sup>7</sup>]U-II<sub>4-11</sub> in polar conditions (PDB entries 6HVB and 6HVC) have been solved by NMR. Since our goal was to  
137 obtain a head-to-tail cyclized version of UII, we decided to start from 3D models of the complete linear UII (11 amino  
138 acids). Therefore two ensembles of 8 and 5 conformations were generated using two distinct strategies: *i*) molecular  
139 dynamics simulations (MD) and *ii*) PEP-FOLD [28]. The models are highly structurally divergent, with typical RMSD  
140 values in excess of 2 Å both within and between the ensembles (**Supplementary Table S6**). Consequently all those  
141 models were used as the starting points for the cyclization (see **Methods**). Based on the average distance between  
142 the N- and C-terminus of the models (7.27+/-2.14 Å), a linker of size 3 was considered, accepting only alanine, proline  
143 and glycines. **Table 2** presents the results cumulated for each of the two ensembles of models. As can be observed,  
144 it is striking that despite the diversity of the conformations and the way they were obtained, those two independent  
145 ensembles of models resulted in a rather stable ranking of the predicted sequences. This is reflected by the fact that  
146 in both cases, the top 4 consists of the same four sequences, as well as by the high overall correlation of the ranks  
147 (Spearman r=0.98).

Table 2: **The likelihood of each of the possible 27 linker sequences.** Two independent series of models (8 generated using MD and 5 using PEP-FOLD) were used as starting points.

| PEP-FOLD |       | MD     |       |
|----------|-------|--------|-------|
| linker   | L     | linker | L     |
| AGG      | -7.42 | AGG    | -7.21 |
| APG      | -7.65 | GAG    | -7.52 |
| GAG      | -7.67 | PGG    | -7.52 |
| PGG      | -7.73 | APG    | -7.61 |
| AGA      | -7.80 | GGG    | -7.64 |
| PAG      | -7.81 | PAG    | -7.69 |
| GGG      | -7.89 | AAG    | -7.78 |
| AAG      | -7.90 | AGA    | -7.80 |
| PGA      | -8.11 | PGA    | -8.10 |
| GAP      | -8.12 | PPG    | -8.11 |
| PPG      | -8.15 | GAP    | -8.21 |
| AGP      | -8.19 | AGP    | -8.22 |
| PAP      | -8.26 | GGA    | -8.23 |
| GGA      | -8.27 | GPG    | -8.36 |
| APP      | -8.29 | PAP    | -8.38 |
| APA      | -8.32 | AAP    | -8.47 |
| AAP      | -8.34 | APA    | -8.49 |
| GPG      | -8.44 | APP    | -8.50 |
| PGP      | -8.50 | PGP    | -8.53 |
| GGP      | -8.66 | GGP    | -8.65 |
| GAA      | -8.75 | GAA    | -8.79 |
| PPP      | -8.80 | PAA    | -8.96 |
| PPA      | -8.82 | PPA    | -8.99 |
| PAA      | -8.88 | PPP    | -9.00 |
| AAA      | -8.97 | AAA    | -9.06 |
| GPP      | -9.08 | GPA    | -9.24 |
| GPA      | -9.11 | GPP    | -9.25 |

148 To test the significance of our approach, we analyzed the impact of one linker in a functional assay. Since the  
149 repetition of similar consecutive amino acids can lead to some difficulties [56], the top-ranked sequence AGG was  
150 discarded; instead, UII was cyclized with the sequence GAG, leading to the LV-4130 cyclic peptide. The head-to-tail  
151 cyclized peptide underwent synthesis and functional tests (see **Methods**). Briefly, the linear precursor (CFWKYCV-

152 GAGETPD) was first assembled on a Fmoc-Asp(Wang resin)-OAL. After selective deprotection of both extremities  
153 and cysteine residues, intramolecular backbone and side-chain to side-chain (S-S) cyclizations, respectively, were suc-  
154 cessively carried out. Finally, after resin cleavage and side-chain deprotection and purification, highly pure bicyclic  
155 UII (LV-4130) was obtained with <1% yield. The pharmacological profile of this synthesis-challenging compound was  
156 assessed by testing its ability to increase intracellular calcium concentration  $[Ca^{2+}]_i$  in human UT-transfected CHO  
157 cells (Eurofins-Cerep), as previously described [57]. As shown in **Figure 4**, UII and LV-4130 induced a dose-dependent  
158 increase in  $[Ca^{2+}]_i$  with  $EC_{50}$  of 0.7 and 46 nM.

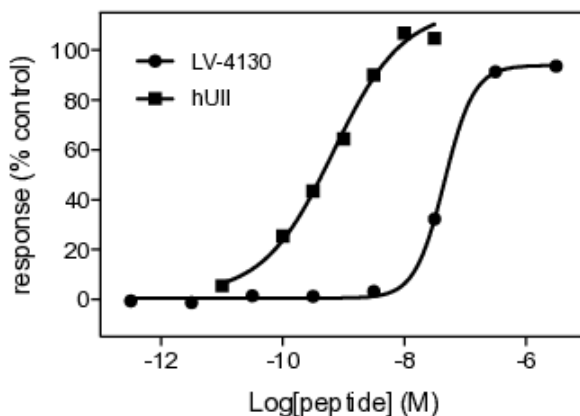

Figure 4: **Concentration-dependent agonist-evoked  $Ca^{2+}$  responses on UT-transfected CHO cells.** Agonist responses were expressed as a percent of the response observed with a maximally effective concentration of UII (100 nM). Data points represent mean of duplicate.

159 Our analysis shows that LV-4130, a first bicyclic UII analogue, retained a substantial ability to increase  $[Ca^{2+}]_i$   
160 in UT-transfected CHO cells. While there is a shift in potency, the  $EC_{50}$  is less than 2 orders of magnitude lower,  
161 and LV-4130 is a nanomolar active UT agonist of peculiar interest. Indeed, its backbone cyclic structure may confer a  
162 less susceptibility to metabolic degradation and a better selectivity for UT or a subset of UT's signaling cascade that  
163 deserves to be investigated.

## 164 Discussion

165 Recently, we have demonstrated that the current structural information available in the Protein Data Bank (PDB) [58]  
166 is sufficient to propose accurate protein loop candidates, in a manner that is robust for conformational inaccuracies. In  
167 the present study, this is shown to be true for peptide cyclization linkers as well. We propose the first computational  
168 method to assist the design of head-to-tail cyclization of an existing peptide structure, a well-known strategy to  
169 enhance peptide resistance to enzymatic degradation and thus peptide bioavailability. The method addresses two  
170 complementary questions, namely : (i) proposing candidate sequences for the linker, a facility to assist medicinal  
171 chemists, and (ii) predicting the 3D conformation of the linker, for further peptide conformational stability analysis  
172 or peptide-receptor docking. Up to now, there has been an evident lack of computational methods to answer those  
173 questions. Existing methods [18–28] are oriented towards de novo design and do not perform head-to-tail cyclization of  
174 existing structures. We are aware of a single existing computational method, the Rosetta protocol by Bhardwaj et al.  
175 [6], that is able to design head-to-tail cyclization linkers for pre-existing peptide structures. However, in that method,  
176 what is pre-defined is the complete structure of the entire cyclic peptide, including the linker; also, the sequence of the  
177 entire peptide is designed from scratch, and not just that of the linker. In contrast, PEP-Cyclizer takes an existing  
178 structure of a linear peptide, and predicts the sequence or structure of a cyclization linker, while leaving the rest of  
179 the peptide undisturbed. To the best of our knowledge, PEP-Cyclizer is the first computational method designed to



180 do this.

181 The performance of PEP-Cyclizer was validated on a set of conotoxins for which both linear and cyclic peptide  
182 structures are known. For comparison, we also evaluated a Rosetta protocol, not the one from Bhardwaj et al. [6],  
183 but the Rosetta NGK protocol [44], a state-of-the-art protocol for building missing loops in crystal structures. It must  
184 be mentioned that Rosetta NGK is not designed for peptide cyclization and we had to modify the input data and  
185 convert the head-to-tail cyclization to loop modelling (*i.e.*, dividing the peptides in two segments and switching them  
186 to generate a gapped structure). In all cases, the peptide linker models generated by PEP-Cyclizer had a significantly  
187 better global accuracy. This is especially evident for the two longest (7 amino acids) linkers, where the RMSD was <  
188 2 Å, while > 5 Å for Rosetta NGK.

189 PEP-Cyclizer is the extension of the DaReUS-Loop algorithm for the problem of head-to-tail peptide cyclization;  
190 details about the algorithm are reported in our previous study [42]. Essentially, the linker/loop is treated as a gap  
191 in the structure, and a structural database search is performed using the flank regions on either side. Like DaReUS-  
192 Loop, PEP-Cyclizer is a consensus method that considers both structural compatibility (*i.e.*, good superposition of  
193 the linker candidate onto the flanks) and sequence compatibility. Therefore, when using PEP-Cyclizer to predict linker  
194 conformations, it is essential to consider all 20 candidate structures. When PEP-Cyclizer is forced to make a single  
195 prediction, the quality deteriorates considerably (from 2.0 to 3.2 Å). While a top-1 accuracy is naturally less favorable  
196 than a best-of-20 for any prediction method, it is specifically true for PEP-Cyclizer, as the effect is much weaker for  
197 Rosetta NGK (from 3.5 to 4.3 Å).

198 In contrast, PEP-Cyclizer is shown to be very robust against conformational changes. For the conotoxin benchmark,  
199 the range of backbone RMSD between the overlapping region of cyclized and uncyclized forms is 0.4-2.5Å. This is to  
200 be compared with the positive control, where this RMSD is zero. However, the global accuracy of the PEP-Cyclizer  
201 models is essentially the same between the two (2.0 Å vs 1.87 Å). This is a stark contrast to Rosetta NGK, which  
202 performs very well on the positive control (1.33 Å), but poorly on the real-world conotoxin benchmark (3.5 Å). This  
203 is an expected result, as Rosetta NGK is primarily designed to complete missing regions in otherwise high-quality  
204 crystal structures. Note that as a high-resolution protocol, Rosetta NGK does a good job in generating accurate local  
205 linker conformations; it is the global positioning of the linker onto the rest of the conotoxin structure where Rosetta  
206 NGK is outperformed by PEP-Cyclizer.

207 The robustness of PEP-Cyclizer for conformational change is also apparent for the prediction of linker sequences.  
208 For UII, sequence prediction was performed on two different structure ensembles that were of different origin and highly  
209 divergent, with very similar results. Note that it is inherently complicated to evaluate linker sequence predictions, as  
210 we only have a few positive cases and no negatives, *i.e.*, we normally do not know that a sequence does *not* cyclize. In  
211 addition, we must stress that PEP-Cyclizer proposes linker candidates based on likely sequence and structure only; in  
212 contrast, it cannot predict if a proposed cyclized peptide is likely to fold or not (or otherwise preserve its stability) if  
213 synthesized *in vitro*. Future research will focus on the prediction of the most likely length of the linker sequence, for  
214 which the current protocol does not show significant predictive power. Still, the result that experimental sequences  
215 were on average better ranked shows that PEP-Cyclizer has at least some predictive power. More importantly, the  
216 activity of the head-to-tail cyclic UII peptide LV-4130 demonstrates that PEP-Cyclizer has direct practical ability in  
217 cyclic peptide-based drug design.

## 218 Materials and Methods

219 In this section we explain the details of PEP-Cyclizer, that is an extension of DaReUS-Loop, a data-based approach  
220 using remote or unrelated structures for loop modelling [42, 43]. Starting from the geometry of flank residues, *i.e.*, four  
221 residues before and four residues after the loop of interest, PEP-Cyclizer mines a structure database and identifies all  
222 possible candidates. It then integrates a filtering step, and in the end, ranks the candidates and proposes a final set  
223 of top models (structures or sequences). PEP-Cyclizer implements two complementary and new functionalities: (*i*)  
224 guessing the linker sequence and (*ii*) modelling the conformation of the linker. The details of those functionalities are

225 depicted in **Figure 1**, and explained in the followings.

## 226 Structure Database

227 We employed two different structure databases. The first one is the database to search for linker candidates, which  
 228 contains the entire set of protein structures available in the PDB. In March 2017, it consisted of 123,417 PDB entries,  
 229 corresponding to 338,613 chains in total. The second database, is the one to search for linker sequences and contains  
 230 the entire set of protein structures available in pdb70. For every database, each chain was split into segments that  
 231 correspond to consecutive regions separated by gaps or non-standard residues, but accepting seleno-methionines. This  
 232 led to two databases with 758,143 and 172,693 protein segments, respectively.

## 233 Test sets

234 To validate our approach, we have searched for cases for which both structures of the un-cyclized and cyclized peptides  
 235 are available. Backbone cyclization has been applied to few conotoxins, as reported in [56], and to the best of our  
 236 knowledge, the structures (NMR/Xray) of only five engineered cyclic conotoxins for which the structure of the un-  
 237 cyclized form exists have been deposited in the PDB database [58]. For one of the cases, two structures of the open  
 238 form have been deposited in PDB (1m2c and 1mii), and their structures deviate by 1Å, and we have included both  
 239 structures in our test set. For 3 additional peptides, the structure of the un-cyclized conformation and information  
 240 about successful linkers are available. **Table 3** reports the details of those studied cases. Of note, the structure of all  
 241 the linear and cyclic peptides in this test set have been determined using NMR, at the exception of one case (4ttl) for  
 242 which it has been solved by X-ray crystallography.

243 Since all the structures of the un-cyclized forms of the peptides have been determined using NMR and have  $N_{uncyclized}$   
 244 conformations, we have performed the head-to-tail cyclization starting from all  $N_{uncyclized}$  NMR conformations. The  
 245 final predictions for the cyclized forms of the peptides have been in turn compared with all the  $N_{cyclized}$  conformations  
 246 of the cyclized structures. **Table 1** summarises the average local and global  $RMSD_{20}^*$  (best out of top 20) and  
 247  $RMSD_1^*$  (top 1) values obtained for each linker (averaged over  $N_{uncyclized}$  conformations).

Table 3: **The list of real cases for head-to-tail cyclization.** The PDB code of the un-cyclized and cyclized peptides (if available) are reported. With the exception of 4ttl, all the other structures are obtained using NMR and has several models. The average RMSD values are measured between all the models of the un-cyclized and cyclized conformations. In some cases more than one linker sequence exist, as reported in the last column of the table.

| un-cyclized  | #NMR models | cyclized | #NMR models | RMSD (Å)      | un-cyclized size | cyclized size | linker sequence |
|--------------|-------------|----------|-------------|---------------|------------------|---------------|-----------------|
| 1m2c         | 14          | 2ajw     | 20          | 1.22 +/- 0.10 | 16               | 22            | GGAAGG          |
| 1m2c         | 14          | 2ak0     | 20          | 1.09 +/- 0.12 | 16               | 23            | GAGGAAG         |
| 1mii         | 20          | 2ajw     | 20          | 1.26 +/- 0.09 | 16               | 22            | GGAAGG          |
| 1mii         | 20          | 2ak0     | 20          | 1.03 +/- 0.12 | 16               | 23            | GAGGAAG         |
| 2h8s         | 20          | 4ttl     | 1           | 0.40 +/- 0.00 | 16               | 22            | GGAAGG          |
| 1ixt         | 20          | 2mso     | 20          | 2.45 +/- 0.07 | 27               | 30            | GLP             |
| 2ew4         | 20          | 2j15     | 21          | 1.03 +/- 0.40 | 13               | 15            | AG              |
| 2ew4         | 20          | -        | -           | -             | 13               | 16            | RGD             |
| 1mxn (1m xp) | 20          | -        | -           | -             | 15               | 17, 19, 19    | AG, AGGG, GGAA  |
| 2jut         | 20          | -        | -           | -             | 13               | 19, 20        | GGAAGG, GGAAGAG |
| 1mvi         | 15          | -        | -           | -             | 25               | 28            | GLP             |

## 248 Input preparation and candidate search

249 We consider head-to-tail cyclization as a loop modelling problem, where the loop flanks are the first and the last four  
 250 residues in the N-terminus and C-terminus, respectively. Accordingly, the minimum acceptable size for the input linear

251 peptide is 8 residues. We then, switch the flanks and search for linker candidates that match those flanks. We employ  
252 the method that was previously introduced to mine the database using a Binet-Cauchy (BC) kernel and a Rigidity  
253 score [59] (detail in **Supporting Materials**).

## 254 Candidate filtering

255 In most cases the number of candidates returned by BCLoopSearch is too large to be tractable, which implies to limit  
256 their number. Different filters were sequentially applied in our protocol for each mode of prediction:

### 257 Modelling the conformation of the linker

- 258 • **Sequence similarity:** The sequence similarity of a linker candidate with the query linker sequence using  
259 BLOSUM62 score. Candidates with negative scores were discarded.
- 260 • **Geometrical clustering:** We used the python Numpy library to measure the pairwise distances (RMSD)  
261 between all the candidates [60]. In addition, we used the python Scipy package to perform hierarchical clustering  
262 [61]. A RMSD cut-off of 1Å was used to group similar linker candidates. To consider memory constraints, we  
263 applied an iterative clustering over subsets of 25,000 candidates, until at most 25,000 clusters were obtained.  
264 Finally, one representative linker candidate with the highest sequence similarity to the query linker was selected  
265 for each cluster. The computational time of our clustering protocol is in the range of 1-5 minutes, however it  
266 depends directly on the number of candidates detected by BCLoopSearch. In extreme cases, the needed time  
267 may increase up to 10-15 minutes.
- 268 • **Local conformation:** Previously, Shen et al. have shown that local conformation profiles predicted from  
269 sequence and profile-profile comparison can be employed to accurately distinguish similar structural fragments  
270 [62]. Consequently, we pre-computed a collection of profiles for all the protein chains in the structure dataset,  
271 and for all proteins of the test sets. For each linker candidate, it is thus possible to extract the sub-profiles  $P$  and  
272  $Q$ , corresponding to the query and candidate linker, and to measure the Jensen Shannon divergence ( $JS(P, Q)$ )  
273 between these profiles:

$$JS(P, Q) = \frac{1}{2}D_{KL}(P, M) + \frac{1}{2}D_{KL}(Q, M) \quad (1)$$

274 where  $M$  corresponds to  $1/2(P + Q)$  and  $D_{KL}$  is the Kullback-Leibler divergence:

$$D_{KL}(P, Q) = \sum_{1 \leq i \leq 27} P(i) \ln(P(i)/Q(i)) \quad (2)$$

275  $P(i)$  is the probability of SA letter  $i$ . Then we measured the average Jensen Shannon divergence ( $JSD$ ) over the  
276 paired series of query and candidate profiles:

$$JSD(P, Q) = \sum_{1 \leq i \leq n} JS(P_i, Q_i)/n \quad (3)$$

277 where  $P_i$  and  $Q_j$  are the two profiles corresponding to positions 1 to L on the query and candidate linker  
278 sequences. Note that a  $JSD$  of 0 indicates a perfect identity of the profiles. This procedure was applied on each  
279 linker candidate and those with a  $JSD > 0.40$  were discarded from the remaining set.

- 280 • **steric clash detection:** After modelling the complete structure, models with steric clashes were discarded  
281 considering the  $C_\alpha$  distance between linker residues and other residues of the protein, using a cut-off value of 3  
282 Å.

## 283 Predicting the linker sequence

- 284 • **Sequence similarity:** If sequence constraints are given, a subset of sequences that represent at least 50%  
285 sequence identity to any of the constraint amino acid types, regardless of their position, are kept.
- 286 • **Local conformation:** Measuring the local conformation of flanks (query and candidate flanks) and discarding  
287 candidates with flank  $JSD > 0.40$ .

## 288 Sequence constraints

289 Throughout the study, linker sequences were predicted using the following sequence constraints. At each position of  
290 the linker, the set of amino acids of the entire experimental linker was considered - for instance, for the RGD linker of  
291 2ew4, the amino acids Arg, Gly and Asp were considered at all three positions, *i.e.*,  $3^3$  different linker sequences are  
292 possible.

## 293 Model building

294 Final energy minimisation was conducted using Gromacs 2018 [63], the CHARMM36m force field [64] and the steepest  
295 descent algorithm for 1000 steps. All bonds were constrained using the LINCS algorithm. The particle mesh Ewald  
296 algorithm was used to handle electrostatics with a 10 Å cutoff for the short-range part and a grid spacing of 1.2 Å for  
297 the long-range contribution in reciprocal space. The Verlet buffer scheme was used for non-bonded interactions, the  
298 neighbour list was updated every 20 steps.

## 299 Model selection

300 To rank the models, we considered the RMSD of the flanks. In case of conformation modelling, our procedure returns a  
301 maximum of 20 models with the lowest *flank RMSD* score. And for sequence guessing, it returns a set of 30 sequences  
302 with the lowest *flank RMSD* score. From this set and considering the sequence constraints, we apply the sequence  
303 inference procedure (as explained below) to propose final set of likely sequences for the linker.

## 304 Candidate sequence inference

305 To draw candidate sequences given the sequences of the candidate linkers identified, we have used a forward-backtrack  
306 procedure. One advantage of such a procedure is to provide both sequences and their likelihood. The probabilities  
307  $p_{aa,linker}^l$  of observing each amino acid type  $aa$  at position  $l$  of the *linker* can be estimated from the amino acid  
308 sequences of the candidate linkers satisfying the condition of peptide cyclization. However, when a reduced number of  
309 amino acids is considered at a given position, these estimates can be performed on a rather low number of sequences.  
310 Consequently, we have estimated pseudo-frequencies, with  $p_{aa}^l = \alpha \cdot p_{aa,linker}^l + (1 - \alpha) \cdot p_{aa,db}^l$  where  $\alpha$  is a value between  
311 0 and 1, and  $p_{aa,db}^l$  is the frequency of amino acid type  $aa$  as observed in a large collection of sequences named  $db$ .  
312 For  $db$ , we have considered the sequences of the loops of 123,417 PDB entries (758,143 protein segments), identified  
313 using the procedure described in [42]. Alternatively, we have also considered  $db_s$ , which corresponds to the subset  
314 of  $db$  corresponding to a loop size of  $s$ . Transition probabilities have been estimated similarly. Pseudo transition  
315 probabilities  $p(aa^l/aa^{l-1})$  were estimated as  $p(aa^l/aa^{l-1}) = \beta \cdot p(aa_{linker}^l/aa_{linker}^{l-1}) + (1 - \beta) \cdot p(aa_{db}^l/aa_{db}^{l-1})$ , where  $\beta$   
316 is a value between 0 and 1. Given estimates of  $p_{aa}^l$  and  $p(aa^l/aa^{l-1})$  we have used the forward-backtrack algorithm  
317 to infer series of amino acids that fit best the estimates. We prefer such procedure to for instance the *viterbi<sub>kbest</sub>*  
318 procedure that, in our experience [65], usually returns less diverse sequences.

## 319 Linker quality assessment

320 To assess the quality of the final linker structures, we use the global RMSD of the linker candidates main chain heavy  
321 atoms (N, C, C $\alpha$  and O), *i.e.*, the modeled cyclic peptides are superimposed on the native structure excluding the  
322 linker region, then the RMSD is calculated over the linker.

## 323 Statistical testing

324 To test the prediction of linker sequences of the conotoxin benchmark, the rank of the experimental linker sequences  
325 were determined. To avoid pseudo-replication, five duplicate cyclic sequences were eliminated; using the remainder of  
326 the benchmark, the overall ranking of the experimental linker sequences was tested for statistical significance. With  
327 the total number of linker sequences varying from case to case, and many instances of tied ranks, it was not feasible  
328 to compute an analytical p-value based on hypergeometric distributions. Instead, random ranks were simulated by  
329 sampling from flat rank distributions, converted to percentiles, and it was evaluated how often the overall mean  
330 percentile was better than the observed mean percentile (37.4) for the experimental linker sequences. This was the  
331 case in 2518/100000 random simulations, *i.e.*, a p-value of 0.025.

## 332 Comparison with other approaches

333 In this work we compare the performance of our linker modelling protocol with the Rosetta NGK [44]. The Rosetta  
334 NGK runs were performed using the protocol provided by [44], and Rosetta energy values were employed for ranking the  
335 models. Considering the fact that Rosetta NGK is not designed for peptide cyclization, we converted the head-to-tail  
336 cyclization to loop modelling, by breaking every peptide into two segments and switching the two.

## 337 Urotensin II cyclization

### 338 Model generation

339 Two sets of 3D models were used. The first one was generated using PEP-FOLD server [28], a *de novo* approach to  
340 peptide structure prediction. Five independent runs of 3D generation (100 models) were run, and five models showing  
341 closed disulfide bonds in the PEP-FOLD coarse grained representation were then submitted to refinement using MD,  
342 with the aim to stabilize the disulfide bond in the all atom representation. The model topology was created using  
343 the Gromacs pdb2gmx command, which did not include the disulphide bond. The topology was further modified  
344 to include the disulfide bond parameter using the gromacs\_py library [66]. Simulations were performed using the  
345 CHARMM-36 force field [67] and the TIP3P model for water. The Gromacs 2018 software [63] was used to run the  
346 simulations. The five models were minimized two times for 10,000 steps with the steepest descent algorithm. During  
347 the first minimisation the bonds were not constraints, as in the second and following steps, all bonds were constrained  
348 using the LINCS algorithm. The five models were solvated in a water box and roughly 150 mM of NaCl. Systems  
349 were again minimized in two similar steps. And then equilibrated in three successive steps, (i) 100 ps with position  
350 restraints of  $1000 \text{ kJmol}^{-1}\text{nm}^{-2}$  applied on the peptide heavy atoms and an integration time step of 1 fs (ii) 500  
351 ps with position restraints of  $1000 \text{ kJmol}^{-1}\text{nm}^{-2}$  applied on the peptide C $\alpha$  atoms, the integration time step was  
352 fixed to 2 fs (iii) 1 ns with position restraints of  $100 \text{ kJmol}^{-1}\text{nm}^{-2}$  applied on the C $\alpha$  atoms. Production runs were  
353 finally computed for 100 ns. The five 100 ns trajectories were then analysed using MDAnalysis library [68]. PCA of  
354 backbone atoms coordinates were computed and the fifteen first components were used to cluster the coordinates. The  
355 clustering DBSCAN algorithm [69] was used using a min\_sample of 20, and sigma value of 5. A total of 13 clusters  
356 was identified, the cluster centroids were chosen by taking the closest element in terms of RMSD to the average cluster  
357 structure. The conformations generated using this protocol are available as supplementary information. All models  
358 underwent sequence guessing to cyclize the peptide.

359 Another set of models was kindly provided by D. Chatenet and co-workers, at INRS Quebec, Canada. It consists  
360 of a set of 8 representative structures of UII displaying the heterogeneous conformational ensemble of this peptide.  
361 The three-dimensional structure of UII was generated from the sequence using the pdbutilities server [https://spin.  
362 niddk.nih.gov/bax/nmrserver/pdbutil/](https://spin.niddk.nih.gov/bax/nmrserver/pdbutil/). System preparation and MD simulations were performed using AMBER  
363 v16 [70] and the ff14SB force field [71]. Simulations were performed at 300 K under constant energy (NVE) conditions  
364 using a 2 fs timestep. The peptide was solvated using the SPC(E) water model in a rectangular box with periodic  
365 boundary conditions. The system was neutralized through the addition of counter ions (Na<sup>+</sup>). The pre-processing

366 steps were followed by equilibration steps, as described previously [72]. All simulations were performed using the  
367 GPU-enabled version of the AMBER simulation engine pmemd. A Particle Mesh Ewald cut-off of 8 Å was used for  
368 the GPU-enabled simulations [73]. The peptide was simulated for a total of 100 ns. Representative structures were  
369 selected by clustering simulation ensembles obtained from the MD simulation trajectory. Clustering was performed  
370 using the hierarchical agglomerative approach with an epsilon cutoff of 3 Å, which represents the minimum distance  
371 between the clusters.

## 372 Peptide synthesis and functional test

373 Linear peptide precursor of LV-4130 was synthesized by Fmoc solid phase methodology on a Liberty microwave assisted  
374 automated peptide synthesizer (CEM, Saclay, France) using the standard manufacturer's procedure at 0.1 mmol scale  
375 on a preloaded Fmoc-Asp(Wang resin)-OAl as previously described [74]. Reactive side chains were protected as follow:  
376 Thr, Tyr, tert-butyl (tBu) ether; Glu, tert-butyl (OtBu) ester; Lys, Trp, tert-butyloxycarbonyl (Boc) carbamate;  
377 Cys, p-methoxytrityl (Mmt) thioether. After completion of the chain assembly, deprotection of the allyl ester was  
378 performed manually. A solution of PheSiH<sub>3</sub> (24 equiv) in DCM (1.3 mL) was added to the H-peptidyl(resin)-OAl  
379 using an Ar flushed gas-tight syringe and gently agitated at room temperature. The Pd(PPh<sub>3</sub>)<sub>4</sub> catalyst (0.3 equiv) in  
380 DCM (3.9 mL) was added and the mixture was stirred for 1 hour. The resin was then washed sequentially with sodium  
381 diethyldithio-carbamate (0.02 M in DMF), DMF and DCM, and dried in vacuo. Head-to-tail cyclisation was performed  
382 on-resin by *in situ* activation of the free carboxyl group with HATU (5 eq), HOAt (5 eq) and DiEA (10 eq) in 10 mL  
383 of DMF, overnight at room temperature. The disulfide bridge was then formed on-resin by selective deprotection of  
384 the Mmt group and subsequent treatment with N-chlorosuccinimide (NCS) as previously described [75]. Briefly, the  
385 resin-bound cyclopeptide was treated five times for 2 min with a solution of 2% trifluoroacetic acid (TFA) in DCM  
386 (5 mL) and washed with DCM. A solution of NCS (2 eq) in DMF (10 mL) was added and left at room temperature  
387 for 15 min, then the resin was washed with DMF and DCM. Finally, the bicyclic peptide was deprotected and cleaved  
388 from the resin by adding 10 ml of the mixture TFA/TIS/H<sub>2</sub>O (9.5:0.25:0.25) for 180 min at room temperature. After  
389 filtration, crude peptide was washed thrice by precipitation in TBME followed by centrifugation (4500 rpm, 15 min).  
390 The synthetic peptide was purified by reversed-phase HPLC on a 21.2 x 250 mm Jupiter C18 (5 μm, 300 Å) column  
391 (Phenomenex, Le Pecq, France) using a linear gradient (30-80% over 45 min) of acetonitrile/TFA (99.9:0.1) at a  
392 flow rate of 10 mL/min. The purified peptides were then characterized by MALDI-TOF mass spectrometry on a  
393 ultrafleXtreme (Bruker, Strasbourg, France) in the reflector mode using α-cyano-4-hydroxycinnamic acid as a matrix.  
394 Analytical RP-HPLC, performed on a 4.6 x 250 mm Jupiter C18 (5 μm, 300 Å) column, indicated that the purity of  
395 the peptide was >99%.

## 396 Intracellular calcium assay

397 Ligand-stimulated intracellular calcium responses were measured at the human UT receptor expressed in transfected  
398 CHO cells using a fluorimetric detection method according to Eurofins-Cerep standard assay protocols (catalog ref.  
399 G099-1376). The assays were performed in duplicate. The results were expressed as a percent of the control response  
400 to 100 nM human UII and plotted using Prism software (GraphPad, San Diego, CA).

## 401 Acknowledgements

402 ANR-10-BINF-0003 (BipBip); ANR-14-2011-IFB; INSERM [U 1133]; Ressource Parisienne en Bioinformatique Struc-  
403 turale (RPBS). The authors thank David Chatenet, Nicolas Doucet and Chitra Narayanan, INRS, Quebec, Canada  
404 for communicating sample conformations of UII.

## 405 Competing interests

406 The authors declare no competing interests.

## 407 References

- 408 1. A. Zorzi, K. Deyle, and C. Heinis. Cyclic peptide therapeutics: past, present and future. *Curr Opin Chem Biol*,  
409 38:24–29, Jun 2017.
- 410 2. A. Falanga, E. Nigro, M. G. De Biasi, A. Daniele, G. Morelli, S. Galdiero, and O. Scudiero. Cyclic Peptides as  
411 Novel Therapeutic Microbicides: Engineering of Human Defensin Mimetics. *Molecules*, 22(7), 07 2017.
- 412 3. N L Daly and D J Craik. Acyclic permutants of naturally occurring cyclic proteins characterization of cystine  
413 knot and  $\beta$ -sheet formation in the macrocyclic polypeptide kalata b1. *Journal of Biological Chemistry*, 275(25):  
414 19068–19075, 2000.
- 415 4. D. G. Barry, N. L. Daly, R. J. Clark, L. Sando, and D. J. Craik. Linearization of a naturally occurring circular  
416 protein maintains structure but eliminates hemolytic activity. *Biochemistry*, 42(22):6688–6695, 2003.
- 417 5. Y. Zhang, Q. Zhang, C. T. T. Wong, and X. Li. Chemoselective Peptide Cyclization and Bicyclization Directly  
418 on Unprotected Peptides. *J. Am. Chem. Soc.*, Jul 2019.
- 419 6. G. Bhardwaj, V. K. Mulligan, C. D. Bahl, J. M. Gilmore, P. J. Harvey, O. Cheneval, G. W. Buchko, S. V.  
420 Pulavarti, Q. Kaas, A. Eletsy, P. S. Huang, W. A. Johnsen, P. J. Greisen, G. J. Rocklin, Y. Song, T. W.  
421 Linsky, A. Watkins, S. A. Rettie, X. Xu, L. P. Carter, R. Bonneau, J. M. Olson, E. Coutsi, C. E. Correnti,  
422 T. Szyperski, D. J. Craik, and D. Baker. Accurate de novo design of hyperstable constrained peptides. *Nature*,  
423 538(7625):329–335, Oct 2016.
- 424 7. C. K. Wang and D. J. Craik. Designing macrocyclic disulfide-rich peptides for biotechnological applications.  
425 *Nat Chem Biol*, 14(5):417–427, 05 2018.
- 426 8. P. Lindholm, U. Göransson, S. Johansson, P. Claeson, J. Gullbo, R. Larsson, L. Bohlin, and A. Backlund.  
427 Cyclotides: a novel type of cytotoxic agents. *Mol Cancer Ther*, 1(6):365–369, Apr 2002.
- 428 9. J. Tang, C. K. Wang, X. Pan, H. Yan, G. Zeng, W. Xu, W. He, N. L. Daly, D. J. Craik, and N. Tan. Isolation  
429 and characterization of cytotoxic cyclotides from *Viola tricolor*. *Peptides*, 31(8):1434–1440, Aug 2010.
- 430 10. James P Tam, Yi-An Lu, Jin-Long Yang, and Kou-Wei Chiu. An unusual structural motif of antimicrobial  
431 peptides containing end-to-end macrocycle and cystine-knot disulfides. *Proceedings of the National Academy of  
432 Sciences*, 96(16):8913–8918, 1999.
- 433 11. Lorents Gran, Knut Sletten, and Lars Skjeldal. Cyclic peptides from *oldenlandia affinis* dc. molecular and  
434 biological properties. *Chemistry & biodiversity*, 5(10):2014–2022, 2008.
- 435 12. Michelle L Colgrave, Andrew C Kotze, David C Ireland, Conan K Wang, and David J Craik. The anthelmintic  
436 activity of the cyclotides: natural variants with enhanced activity. *Chembiochem*, 9(12):1939–1945, 2008.
- 437 13. Michelle L Colgrave, Andrew C Kotze, Yen-Hua Huang, John O’Grady, Shane M Simonsen, and David J Craik.  
438 Cyclotides: natural, circular plant peptides that possess significant activity against gastrointestinal nematode  
439 parasites of sheep. *Biochemistry*, 47(20):5581–5589, 2008.
- 440 14. R. Dahiya, S. Singh, A. Sharma, S. V. Chennupati, and S. Maharaj. First Total Synthesis and Biological  
441 Screening of a Proline-Rich Cyclopeptide from a Caribbean Marine Sponge. *Mar Drugs*, 14(12), Dec 2016.

- 442 15. X. Jing and K. Jin. A gold mine for drug discovery: Strategies to develop cyclic peptides into therapies. *Med*  
443 *Res Rev*, 40(2):753–810, Mar 2020.
- 444 16. Ali Tavassoli. Siclopps cyclic peptide libraries in drug discovery. *Current Opinion in Chemical Biology*, 38:  
445 30–35, 2017.
- 446 17. Toby Passioura, Takayuki Katoh, Yuki Goto, and Hiroaki Suga. Selection-based discovery of druglike macrocyclic  
447 peptides. *Annual review of biochemistry*, 83:727–752, 2014.
- 448 18. Diana P Slough, Sean M McHugh, Ashleigh E Cummings, Peng Dai, Bradley L Pentelute, Joshua A Kritzer,  
449 and Yu-Shan Lin. Designing well-structured cyclic pentapeptides based on sequence–structure relationships.  
450 *The Journal of Physical Chemistry B*, 122(14):3908–3919, 2018.
- 451 19. Jiabo Li, Tedman Ehlers, Jon Sutter, Shikha Varma-O’Brien, and Johannes Kirchmair. Caesar: a new con-  
452 former generation algorithm based on recursive buildup and local rotational symmetry consideration. *Journal*  
453 *of chemical information and modeling*, 47(5):1923–1932, 2007.
- 454 20. Paul CD Hawkins, A Geoffrey Skillman, Gregory L Warren, Benjamin A Ellingson, and Matthew T Stahl.  
455 Conformer generation with omega: algorithm and validation using high quality structures from the protein  
456 databank and cambridge structural database. *Journal of chemical information and modeling*, 50(4):572–584,  
457 2010.
- 458 21. Fergal J Duffy, Mélanie Verniere, Marc Devocelle, Elise Bernard, Denis C Shields, and Anthony J Chubb.  
459 Cyclops: generating virtual libraries of cyclized and constrained peptides including nonnatural amino acids.  
460 *Journal of chemical information and modeling*, 51(4):829–836, 2011.
- 461 22. M. P. Jacobson, D. L. Pincus, C. S. Rapp, T. JF Day, B. Honig, D. E. Shaw, and R. A. Friesner. A hierarchical  
462 approach to all-atom protein loop prediction. *Proteins: Structure, Function, and Bioinformatics*, 55(2):351–367,  
463 2004.
- 464 23. Daniel J Mandell, Evangelos A Coutsiias, and Tanja Kortemme. Sub-angstrom accuracy in protein loop recon-  
465 struction by robotics-inspired conformational sampling. *Nature methods*, 6(8):551–552, 2009.
- 466 24. Annick Thomas, Sébastien Deshayes, Marc Decaffmeyer, Marie Hélène Van Eyck, Benoit Charloteaux, and  
467 Robert Brasseur. Prediction of peptide structure: how far are we? *Proteins: Structure, Function, and Bioin-*  
468 *formatics*, 65(4):889–897, 2006.
- 469 25. Jérôme Beaufays, Laurence Lins, Annick Thomas, and Robert Brasseur. In silico predictions of 3d structures  
470 of linear and cyclic peptides with natural and non-proteinogenic residues. *Journal of Peptide Science*, 18(1):  
471 17–24, 2012.
- 472 26. Sandeep Singh, Harinder Singh, Abhishek Tuknait, Kumardeep Chaudhary, Balvinder Singh, S Kumaran, and  
473 Gajendra PS Raghava. Pepstrmod: structure prediction of peptides containing natural, non-natural and modified  
474 residues. *Biology direct*, 10(1):73, 2015.
- 475 27. Pierre Thevenet, Yimin Shen, Julien Maupetit, Frédéric Guyon, Philippe Derreumaux, and Pierre Tuffery. Pep-  
476 fold: an updated de novo structure prediction server for both linear and disulfide bonded cyclic peptides. *Nucleic*  
477 *acids research*, 40(W1):W288–W293, 2012.
- 478 28. Yimin Shen, Julien Maupetit, Philippe Derreumaux, and Pierre Tufféry. Improved pep-fold approach for peptide  
479 and miniprotein structure prediction. *Journal of chemical theory and computation*, 10(10):4745–4758, 2014.
- 480 29. Sean M McHugh, Julia R Rogers, Sarah A Solomon, Hongtao Yu, and Yu-Shan Lin. Computational methods  
481 to design cyclic peptides. *Current opinion in chemical biology*, 34:95–102, 2016.



- 482 30. A. G. Poth, L. Y. Chan, and D. J. Craik. Cyclotides as grafting frameworks for protein engineering and drug  
483 design applications. *Biopolymers*, 100(5):480–491, Sep 2013.
- 484 31. Eric Valeur, Stéphanie M Guéret, Hélène Adihou, Ranganath Gopalakrishnan, Malin Lemurell, Herbert Wald-  
485 mann, Tom N Grossmann, and Alleyn T Plowright. New modalities for challenging targets in drug discovery.  
486 *Angewandte Chemie International Edition*, 56(35):10294–10323, 2017.
- 487 32. Richard J Clark, Harald Fischer, Louise Dempster, Norelle L Daly, K Johan Rosengren, Simon T Nevin, Fred-  
488 eric A Meunier, David J Adams, and David J Craik. Engineering stable peptide toxins by means of backbone  
489 cyclization: stabilization of the  $\alpha$ -conotoxin mii. *Proceedings of the National Academy of Sciences*, 102(39):  
490 13767–13772, 2005.
- 491 33. Christopher J Armishaw, Julie L Dutton, David J Craik, and Paul F Alewood. Establishing regiocontrol of  
492 disulfide bond isomers of  $\alpha$ -conotoxin imi via the synthesis of n-to-c cyclic analogs. *Peptide Science: Original  
493 Research on Biomolecules*, 94(3):307–313, 2010.
- 494 34. Richard J Clark, Jonas Jensen, Simon T Nevin, Brid P Callaghan, David J Adams, and David J Craik. The en-  
495 gineering of an orally active conotoxin for the treatment of neuropathic pain. *Angewandte Chemie International  
496 Edition*, 49(37):6545–6548, 2010.
- 497 35. Reena Halai, Brid Callaghan, N. L. Daly, Richard J Clark, David J Adams, and David J Craik. Effects of  
498 cyclization on stability, structure, and activity of  $\alpha$ -conotoxin rgia at the  $\alpha 9\alpha 10$  nicotinic acetylcholine receptor  
499 and gabab receptor. *Journal of medicinal chemistry*, 54(19):6984–6992, 2011.
- 500 36. C. J. Armishaw, A. A. Jensen, L. D. Balle, K. C. Scott, L. Sérensen, and K. Str?mgaard. Improving the stability  
501 of  $\alpha$ -conotoxin AuIB through N-to-C cyclization: the effect of linker length on stability and activity at nicotinic  
502 acetylcholine receptors. *Antioxid. Redox Signal.*, 14(1):65–76, Jan 2011.
- 503 37. E. S. Lovelace, S. Gunasekera, C. Alvarmo, R. J. Clark, S. T. Nevin, A. A. Grishin, D. J. Adams, D. J. Craik,  
504 and N. L. Daly. Stabilization of  $\alpha$ -conotoxin AuIB: influences of disulfide connectivity and backbone cyclization.  
505 *Antioxid. Redox Signal.*, 14(1):87–95, Jan 2011.
- 506 38. E. S. Lovelace, C. J. Armishaw, M. L. Colgrave, M. E. Wahlstrom, P. F. Alewood, N. L. Daly, and D. J. Craik.  
507 Cyclic MrIA: a stable and potent cyclic conotoxin with a novel topological fold that targets the norepinephrine  
508 transporter. *J. Med. Chem.*, 49(22):6561–6568, Nov 2006.
- 509 39. Z. Dekan, C. I. Wang, R. K. Andrews, R. J. Lewis, and P. F. Alewood. Conotoxin engineering: dual phar-  
510 macophoric noradrenaline transport inhibitor/integrin binding peptide with improved stability. *Org. Biomol.  
511 Chem.*, 10(30):5791–5794, Aug 2012.
- 512 40. X. Hemu, M. Taichi, Y. Qiu, D. X. Liu, and J. P. Tam. Biomimetic synthesis of cyclic peptides using novel  
513 thioester surrogates. *Biopolymers*, 100(5):492–501, Sep 2013.
- 514 41. Muharrem Akcan, Richard J Clark, Norelle L Daly, Anne C Conibear, Andrew de Faoite, Mari D Heghinian, Tal-  
515 war Sahil, David J Adams, Frank Marí, and David J Craik. Transforming conotoxins into cyclotides: Backbone  
516 cyclization of p-superfamily conotoxins. *Peptide Science*, 104(6):682–692, 2015.
- 517 42. Y. Karami, F. Guyon, S. De Vries, and P. Tufféry. DaReUS-Loop: accurate loop modeling using fragments from  
518 remote or unrelated proteins. *Sci Rep*, 8(1):13673, Sep 2018.
- 519 43. Y. Karami, J. Rey, G. Postic, S. Murail, P. Tufféry, and S. J. de Vries. DaReUS-Loop: a web server to model  
520 multiple loops in homology models. *Nucleic Acids Res.*, 47(W1):W423–W428, Jul 2019.

- 521 44. Amelie Stein and Tanja Kortemme. Improvements to robotics-inspired conformational sampling in rosetta. *PLoS*  
522 *One*, 8(5):e63090, 2013.
- 523 45. Y. Coulouarn, I. Lihmann, S. Jegou, Y. Anouar, H. Tostivint, J. C. Beauvillain, J. M. Conlon, H. A. Bern,  
524 and H. Vaudry. Cloning of the cDNA encoding the urotensin II precursor in frog and human reveals intense  
525 expression of the urotensin II gene in motoneurons of the spinal cord. *Proc Natl Acad Sci U S A*, 95(26):  
526 15803–15808, Dec 1998.
- 527 46. H. Vaudry, J. Leprince, D. Chatenet, A. Fournier, D. G. Lambert, J. C. Le Mevel, E. H. Ohlstein, A. Schwertani,  
528 H. Tostivint, and D. Vaudry. International Union of Basic and Clinical Pharmacology. XCII. Urotensin II,  
529 urotensin II-related peptide, and their receptor: from structure to function. *Pharmacol Rev*, 67(1):214–258,  
530 2015.
- 531 47. J. Leprince, D. Chatenet, C. Dubessy, A. Fournier, B. Pfeiffer, E. Scalbert, P. Renard, P. Pacaud, H. Oulyadi,  
532 I. Segalas-Milazzo, L. Guilhaudis, D. Davoust, M. C. Tonon, and H. Vaudry. Structure-activity relationships of  
533 urotensin II and URP. *Peptides*, 29(5):658–673, May 2008.
- 534 48. E. Cadirci, R. A. Ugan, B. Dincer, B. Gundogdu, I. Cinar, E. Akpınar, and Z. Halici. Urotensin receptors as a  
535 new target for CLP induced septic lung injury in mice. *Naunyn Schmiedebergs Arch Pharmacol*, 392(2):135–145,  
536 02 2019.
- 537 49. A. Tapeinou, M. T. Matsoukas, C. Simal, and T. Tselios. Review cyclic peptides on a merry-go-round; towards  
538 drug design. *Biopolymers*, 104(5):453–461, Sep 2015.
- 539 50. R. Bhaskaran, A. I. Arunkumar, and C. Yu. NMR and dynamical simulated annealing studies on the solution  
540 conformation of urotensin II. *Biochim Biophys Acta*, 1199(2):115–122, Mar 1994.
- 541 51. S. Flohr, M. Kurz, E. Kostenis, A. Brkovich, A. Fournier, and T. Klabunde. Identification of nonpeptidic  
542 urotensin II receptor antagonists by virtual screening based on a pharmacophore model derived from structure-  
543 activity relationships and nuclear magnetic resonance studies on urotensin II. *J Med Chem*, 45(9):1799–1805,  
544 Apr 2002.
- 545 52. E. Lescot, J. Sopkova-de Oliveira Santos, C. Dubessy, H. Oulyadi, A. Lesnard, H. Vaudry, R. Bureau, and  
546 S. Rault. Definition of new pharmacophores for nonpeptide antagonists of human urotensin-II. Comparison  
547 with the 3D-structure of human urotensin-II and URP. *J Chem Inf Model*, 47(2):602–612, 2007.
- 548 53. A. Carotenuto, P. Grieco, P. Campiglia, E. Novellino, and P. Rovero. Unraveling the active conformation of  
549 urotensin II. *J Med Chem*, 47(7):1652–1661, Mar 2004.
- 550 54. Jason P Mulvenna, Conan Wang, and David J Craik. Cybase: a database of cyclic protein sequence and  
551 structure. *Nucleic acids research*, 34(suppl.1):D192–D194, 2006.
- 552 55. Conan KL Wang, Quentin Kaas, Laurent Chiche, and David J Craik. Cybase: a database of cyclic protein  
553 sequences and structures, with applications in protein discovery and engineering. *Nucleic acids research*, 36  
554 (suppl.1):D206–D210, 2007.
- 555 56. Xiaosa Wu, Yen-Hua Huang, Quentin Kaas, and David J Craik. Cyclisation of disulfide-rich conotoxins in drug  
556 design applications. *European Journal of Organic Chemistry*, 2016(21):3462–3472, 2016.
- 557 57. C. L. Herold, D. J. Behm, P. T. Buckley, J. J. Foley, W. E. Wixted, H. M. Sarau, and S. A. Douglas. The  
558 neuromedin B receptor antagonist, BIM-23127, is a potent antagonist at human and rat urotensin-II receptors.  
559 *Br J Pharmacol*, 139(2):203–207, May 2003.

- 560 58. Helen M. Berman, John Westbrook, Zukang Feng, Gary Gilliland, T. N. Bhat, Helge Weissig, Ilya N. Shindyalov,  
561 and Philip E. Bourne. The Protein Data Bank. *Nucleic Acids Research*, 28(1):235–242, 01 2000.
- 562 59. F. Guyon, F. Martz, M. Vavrusa, J. Becot, J. Rey, and P. Tufféry. BCSearch: fast structural fragment mining  
563 over large collections of protein structures. *Nucleic Acids Res.*, 43(W1):W378–382, Jul 2015.
- 564 60. Travis E Oliphant. *A guide to NumPy*, volume 1. Trelgol Publishing USA, 2006.
- 565 61. Eric Jones, Travis Oliphant, Pearu Peterson, et al. SciPy: Open source scientific tools for Python, 2001–. URL  
566 <http://www.scipy.org/>.
- 567 62. Yimin Shen, Géraldine Picord, Frédéric Guyon, and Pierre Tufféry. Detecting protein candidate fragments using  
568 a structural alphabet profile comparison approach. *PLoS one*, 8(11):e80493, 2013.
- 569 63. Mark James Abraham, Teemu Murtola, Roland Schulz, Szilárd Páll, Jeremy C Smith, Berk Hess, and Erik  
570 Lindahl. Gromacs: High performance molecular simulations through multi-level parallelism from laptops to  
571 supercomputers. *SoftwareX*, 1:19–25, 2015.
- 572 64. J. Huang, S. Rauscher, G. Nawrocki, T. Ran, M. Feig, B. L. de Groot, H. Grubmuller, and A. D. MacKerell.  
573 CHARMM36m: an improved force field for folded and intrinsically disordered proteins. *Nat. Methods*, 14(1):  
574 71–73, 01 2017.
- 575 65. Alexis Lamiable, Pierre Thévenet, and Pierre Tufféry. A critical assessment of hidden markov model sub-optimal  
576 sampling strategies applied to the generation of peptide 3d models. *Journal of computational chemistry*, 37(21):  
577 2006–2016, 2016.
- 578 66. Samuel Murail. gromacs-py: A gromacs python wrapper, October 2018. URL [https://doi.org/10.5281/  
579 zenodo.1455734](https://doi.org/10.5281/zenodo.1455734).
- 580 67. Jing Huang and Alexander D MacKerell Jr. Charmm36 all-atom additive protein force field: Validation based  
581 on comparison to nmr data. *Journal of computational chemistry*, 34(25):2135–2145, 2013.
- 582 68. Richard J Gowers, Max Linke, Jonathan Barnoud, Tyler John Edward Reddy, Manuel N Melo, Sean L Seyler,  
583 Jan Domanski, David L Dotson, Sébastien Buchoux, Ian M Kenney, et al. Mdanalysis: a python package for  
584 the rapid analysis of molecular dynamics simulations. Technical report, Los Alamos National Lab.(LANL), Los  
585 Alamos, NM (United States), 2019.
- 586 69. K Mahesh Kumar and A Rama Mohan Reddy. A fast dbscan clustering algorithm by accelerating neighbor  
587 searching using groups method. *Pattern Recognition*, 58:39–48, 2016.
- 588 70. DA Case, Josh Berryman, RM Betz, DS Cerutti, TE Cheatham Iii, TA Darden, RE Duke, TJ Giese, H Gohlke,  
589 AW Goetz, et al. Amber 2015. 2015.
- 590 71. James A Maier, Carmenza Martinez, Koushik Kasavajhala, Lauren Wickstrom, Kevin E Hauser, and Carlos  
591 Simmerling. ff14sb: improving the accuracy of protein side chain and backbone parameters from ff99sb. *Journal  
592 of chemical theory and computation*, 11(8):3696–3713, 2015.
- 593 72. Pratul K Agarwal. Cis/trans isomerization in hiv-1 capsid protein catalyzed by cyclophilin a: Insights from  
594 computational and theoretical studies. *Proteins: Structure, Function, and Bioinformatics*, 56(3):449–463, 2004.
- 595 73. Romelia Salomon-Ferrer, Andreas W Gotz, Duncan Poole, Scott Le Grand, and Ross C Walker. Routine  
596 microsecond molecular dynamics simulations with amber on gpus. 2. explicit solvent particle mesh ewald. *Journal  
597 of chemical theory and computation*, 9(9):3878–3888, 2013.

- 598 74. Axel Touchard, Samira R Aili, Nathan Téné, Valentine Barassé, Christophe Klopp, Alain Dejean, R Manjunatha  
599 Kini, Mrinalini, Laurent Coquet, Thierry Jouenne, et al. Venom peptide repertoire of the european myrmicine  
600 ant manica rubida: identification of insecticidal toxins. *Journal of Proteome Research*, 19(4):1800–1811, 2020.
- 601 75. Tobias M Postma and Fernando Albericio. N-chlorosuccinimide, an efficient reagent for on-resin disulfide for-  
602 mation in solid-phase peptide synthesis. *Organic letters*, 15(3):616–619, 2013.

# Supplementary Materials

## Database search

We previously introduced the BCLoopSearch protocol, to mine large protein structure datasets and retrieve loop candidates, given two disjoint fragments (loop flanks) [59]. It is based on a Binet-Cauchy (BC) kernel and a Rigidity score:

$$BC(X, Y) = \frac{\det(X^T Y)}{\sqrt{\det(X^T X) \det(Y^T Y)}} \quad (4)$$

where  $X$  and  $Y$  are  $C_\alpha$  coordinates of the flanks and dataset fragments, respectively and they are centered at the origin. Note that a BC score of 1 indicates a perfect match. *Rigidity* score  $R(X, Y)$  is defined as:

$$R'(X, Y) = \max_{1 \leq i \leq N} \|X_i - Y_i\| \quad (5)$$

$$R(X, Y) = \max\{R'(X, Y), \|X_N - X_1\| - \|Y_N - Y_1\|\} \quad (6)$$

where  $X_i$  and  $Y_i$  are  $C_\alpha$  coordinates of the  $i$ th residues of the flanks and dataset fragments and  $\|\cdot\|$  is the euclidean norm. Rigidity score is the maximum variation of intra-distances between: (i) residues and geometric center and (ii) intra-distances between terminal  $C_\alpha$ . In addition, we also measured the RMSD between query and candidate flanks for the fragments returned. In total, four cut-offs values related to (i) flank size, (ii) flank BC score, (iii) flank Rigidity and (iv) flank RMSD, have been considered to limit the number of loop candidates. In this study we used: a flank size of 4 residues, Rigidity  $\leq 2.5$ , flank RMSD  $\leq 4 \text{ \AA}$  and the minimal flank BC score cut-off of 0.8.

## 615 CyBase benchmark

616 CyBase (<http://www.cybase.org.au/>) [54, 55] provides a set of existing naturally occurring cyclic peptides. Presently,  
 617 64 3D structures of cyclic peptides from 25 different species are reported. We applied a filtering step on the list to keep  
 618 only those that are *i*) head-to-tail cyclized, *ii*) without modified amino acids and *iii*) not identical (filtering out entries  
 619 with identical sequences), resulting in a final set of 35 structures. Residues from the N- and/or C-terminal extremities  
 620 of each cyclic peptide were removed to generate linear peptides (here by N- and C-terminal extremity, we refer to  
 621 the head and tail residues from the sequence). We considered all possible combinations of truncating two to seven  
 622 residues from the N- and/or C-termini (*i.e.*, removing two residues from N-terminus or two residues from C-terminus  
 623 or one residue from each side), generating 33 different linear peptides from every cyclic target. We also excluded the  
 624 cases where the size of generated linear peptide was less than 8 residues, that is size limit of our protocol. Finally  
 625 we obtained a total of 1147 linear peptides, where the corresponding linkers are in the range of 2-7 residue long. The  
 626 details of those structures are reported in **Supplementary Table S1**.

Table S1: **The list of cyclic structures from CyBase**. Structures with identical sequences were discarded and only one representative was considered. For each cyclic peptide, we generated a total of 33 linear peptides by truncating two to seven residues from N- and/or C-term. The total number of linear peptides for each target, as well as those modelled with PEP-Cyclizer and Rosetta NGK are reported.

| Protein name                 | Class                      | Type | PDBcode | size | #linkers | #linkers (PEP-Cyclizer) | #linkers (NGK) |
|------------------------------|----------------------------|------|---------|------|----------|-------------------------|----------------|
| kalata-B1                    | Cyclotide                  | NMR  | 1NB1    | 29   | 33       | 33                      | 33             |
| kalata-B1                    | Cyclotide                  | NMR  | 1K48    | 29   | 33       | 33                      | 32             |
| kalata-B1                    | Cyclotide                  | NMR  | 1KAL    | 29   | 33       | 33                      | 32             |
| [P20D,V21K]-kalata-B1        | Cyclotide                  | NMR  | 2F2I    | 29   | 33       | 33                      | 33             |
| [W19K,-P20N,-V21K]-kalata-B1 | Cyclotide                  | NMR  | 2F2J    | 29   | 33       | 33                      | 33             |
| kalata-B2                    | Cyclotide                  | NMR  | 1PT4    | 29   | 33       | 33                      | 33             |
| kalata-B5                    | Cyclotide                  | NMR  | 2KUX    | 30   | 33       | 32                      | 33             |
| kalata-B7                    | Cyclotide                  | NMR  | 2JWM    | 29   | 33       | 33                      | 33             |
| kalata-B7                    | Cyclotide                  | NMR  | 2M9O    | 29   | 33       | 33                      | 33             |
| kalata-B8                    | Cyclotide                  | NMR  | 2B38    | 31   | 33       | 33                      | 33             |
| kalata-B12                   | Cyclotide                  | NMR  | 2KVX    | 28   | 33       | 32                      | 33             |
| cycloviolacin-O1             | Cyclotide                  | NMR  | 1NBJ    | 30   | 33       | 32                      | 33             |
| cycloviolacin-O1             | Cyclotide                  | NMR  | 1DF6    | 30   | 33       | 33                      | 33             |
| cycloviolacin-O2             | Cyclotide                  | NMR  | 2KNM    | 30   | 33       | 32                      | 33             |
| cycloviolacin-O14            | Cyclotide                  | NMR  | 2GJ0    | 31   | 33       | 33                      | 33             |
| MCoTI-II                     | Squash-trypsin-inhibitor   | XRAY | 4GUX    | 34   | 33       | 33                      | 33             |
| circulin-A                   | Cyclotide                  | NMR  | 1BH4    | 30   | 33       | 32                      | 33             |
| circulin-B                   | Cyclotide                  | NMR  | 2ERI    | 31   | 33       | 33                      | 33             |
| kB1[GHFRWG;23-28]            | Cyclotide                  | NMR  | 2LUR    | 29   | 33       | 32                      | 32             |
| [Ala1,15]kB1                 | Cyclotide                  | NMR  | 1N1U    | 29   | 33       | 33                      | 33             |
| des(24-28)kB1                | Cyclotide                  | NMR  | 1ORX    | 24   | 33       | 33                      | 32             |
| SFTI-1                       | BBi-like-trypsin-inhibitor | XRAY | 3P8F    | 14   | 25       | 25                      | 25             |
| Ent-AS-48                    | Bacterial                  | XRAY | 1O82    | 70   | 33       | 33                      | 33             |
| vhl-1                        | Cyclotide                  | NMR  | 1ZA8    | 31   | 33       | 33                      | 33             |
| vhl-2                        | Cyclotide                  | NMR  | 2KUK    | 30   | 33       | 33                      | 33             |
| varv-peptide-F               | Cyclotide                  | NMR  | 2K7G    | 29   | 33       | 33                      | 33             |
| varv-peptide-F               | Cyclotide                  | XRAY | 3E4H    | 29   | 33       | 33                      | 33             |
| BiKK                         | BBi-like-trypsin-inhibitor | NMR  | 2BEY    | 16   | 33       | 33                      | 33             |
| RTD-1                        | Primate                    | NMR  | 1HVZ    | 18   | 33       | 33                      | 33             |
| palicourein                  | Cyclotide                  | NMR  | 1R1F    | 37   | 33       | 33                      | 33             |
| vhr1                         | Cyclotide                  | NMR  | 1VB8    | 30   | 33       | 31                      | 33             |
| tricyclon-A                  | Cyclotide                  | NMR  | 1YP8    | 33   | 33       | 33                      | 33             |
| Cter-M                       | Cyclotide                  | NMR  | 2LAM    | 29   | 33       | 33                      | 33             |
| MCo-PMI                      | Squash-trypsin-inhibitor   | NMR  | 2M86    | 51   | 33       | 33                      | 31             |
| Carnocyclin-A                | Bacterial                  | NMR  | 2KJF    | 60   | 33       | 33                      | 33             |
| total                        |                            |      |         |      | 1147     | 1141                    | 1141           |

627 We applied both our protocol and Rosetta NGK to the CyBase test set to model all the linkers. Over the 1147 cases,

628 both our data-mining and Rosetta NGK failed to model the linker for 6 different cases (0.5%). In fact, our protocol  
 629 identified candidates in all cases, but discarded all the candidates with a correct geometry but a non satisfactory  
 630 sequence similarity in 6 cases. Thus overall, in terms of ability to identify linkers, the data-mining strategy seems to  
 631 perform as well as a pure *ab initio* procedure. Then, we compared both protocols using the 1135 over 1147 (99%) cases  
 632 for which the linker could be modelled by both methods. All heavy backbone atoms (N, C, C $\alpha$ , O) were considered.  
 633 The local RMSD corresponds to RMSD obtained by superposing the model linker on the native conformation using a  
 634 best fit procedure, whereas the global RMSD corresponds to RMSD observed after superposing the linear part of the  
 635 peptide (*i.e.*, without the linker). The best RMSD over the top 20 predictions by each method were retained.

Table S2: **The RMSD values for all the linkers of each structure from CyBase.** The average local and global RMSD values are measured over the backbone atoms (N, C, C $\alpha$ , O) for the linkers modelled by both PEP-Cyclizer and Rosetta NGK. For each cyclic peptide, we generated a total of 33 linear peptides by truncating two to seven residues from N- and/or C-terminal extremities. For each target, the number of linear peptides that were cyclized by both PEP-Cyclizer and Rosetta NGK are reported (out of the total 33 linkers).

| Protein name                 | number of linkers | local RMSD (Å) |           | global RMSD (Å) |           |
|------------------------------|-------------------|----------------|-----------|-----------------|-----------|
|                              |                   | PEP-Cyclizer   | NGK       | PEP-Cyclizer    | NGK       |
| kalata-B1                    | 33                | 0.53±0.22      | 0.56±0.37 | 1.17±0.45       | 1.05±0.46 |
| kalata-B1                    | 32                | 0.69±0.34      | 0.70±0.57 | 2.05±1.40       | 1.77±2.43 |
| kalata-B1                    | 32                | 0.71±0.26      | 1.04±0.55 | 1.45±0.47       | 1.71±0.96 |
| [P20D,V21K]-kalata-B1        | 33                | 0.65±0.37      | 0.52±0.38 | 1.40±0.70       | 0.99±0.77 |
| [W19K,-P20N,-V21K]-kalata-B1 | 33                | 0.54±0.28      | 0.71±0.40 | 1.31±0.70       | 1.24±0.65 |
| kalata-B2                    | 33                | 0.49±0.17      | 0.40±0.38 | 1.12±0.47       | 0.73±0.66 |
| kalata-B5                    | 32                | 0.74±0.45      | 0.45±0.57 | 1.83±1.53       | 0.88±1.54 |
| kalata-B7                    | 33                | 0.58±0.19      | 0.82±0.65 | 1.15±0.32       | 1.13±0.73 |
| kalata-B7                    | 33                | 0.79±0.36      | 0.56±0.58 | 2.11±1.52       | 1.45±2.06 |
| kalata-B8                    | 33                | 1.12±0.57      | 1.14±0.61 | 2.57±1.13       | 2.11±1.22 |
| kalata-B12                   | 32                | 0.74±0.38      | 0.69±0.37 | 1.57±1.07       | 1.40±1.32 |
| cycloviolacin-O1             | 32                | 1.08±0.68      | 0.43±0.17 | 2.83±1.98       | 0.91±0.33 |
| cycloviolacin-O1             | 33                | 0.98±0.43      | 1.15±0.43 | 2.14±1.24       | 1.99±1.17 |
| cycloviolacin-O2             | 32                | 0.75±0.43      | 0.38±0.39 | 2.07±1.76       | 0.75±1.30 |
| cycloviolacin-O14            | 33                | 0.94±0.57      | 0.79±0.89 | 2.61±1.91       | 2.01±2.54 |
| MCoTI-II                     | 33                | 0.73±0.43      | 0.31±0.44 | 1.70±0.78       | 0.64±1.13 |
| circulin-A                   | 33                | 0.97±0.34      | 0.88±0.34 | 2.37±0.96       | 1.59±0.87 |
| circulin-B                   | 33                | 1.02±0.44      | 0.37±0.17 | 2.22±0.91       | 0.61±0.30 |
| kB1[GHFRWG;23-28]            | 32                | 1.08±0.45      | 1.16±0.40 | 2.61±1.23       | 2.18±0.87 |
| [Ala1,15]kB1                 | 33                | 0.93±0.39      | 0.88±0.33 | 1.94±0.73       | 1.22±0.51 |
| des(24-28)kB1                | 32                | 1.34±0.55      | 1.60±0.64 | 2.44±0.81       | 2.88±1.37 |
| SFTI-1                       | 25                | 0.50±0.41      | 0.22±0.14 | 1.48±1.19       | 0.57±0.48 |
| Ent-AS-48                    | 33                | 0.54±0.29      | 0.14±0.08 | 1.16±0.53       | 0.23±0.10 |
| vhl-1                        | 33                | 0.87±0.46      | 0.36±0.27 | 1.88±1.01       | 0.66±0.32 |
| vhl-2                        | 33                | 0.53±0.25      | 0.71±0.74 | 1.24±0.52       | 1.11±0.95 |
| varv-peptide-F               | 33                | 0.61±0.42      | 0.51±0.64 | 1.86±1.62       | 1.24±2.12 |
| varv-peptide-F               | 33                | 0.50±0.21      | 0.41±0.28 | 1.17±0.52       | 0.79±0.35 |
| BiKK                         | 33                | 0.64±0.47      | 1.05±0.75 | 1.64±1.27       | 1.87±1.36 |
| RTD-1                        | 33                | 0.72±0.37      | 0.74±0.43 | 1.98±0.84       | 1.77±0.94 |
| palicourein                  | 33                | 1.12±0.36      | 1.11±0.32 | 2.24±1.02       | 1.93±0.59 |
| vhr1                         | 31                | 0.97±0.58      | 0.61±0.34 | 2.36±1.59       | 1.23±0.48 |
| tricyclon-A                  | 33                | 0.79±0.30      | 0.68±0.48 | 1.64±0.57       | 1.13±0.86 |
| Cter-M                       | 33                | 0.60±0.42      | 0.54±0.69 | 1.62±1.43       | 1.45±2.08 |
| MCo-PMI                      | 31                | 1.11±0.48      | 1.09±0.51 | 2.33±1.22       | 1.93±1.19 |
| Carnocyclin-A                | 33                | 0.52±0.26      | 0.23±0.13 | 1.21±0.47       | 0.48±0.22 |

| linker size (# gaps) |              | 2 (101)   | 3 (139)   | 4 (175)   | 5(208)    | 6 (241)   | 7 (271)   |
|----------------------|--------------|-----------|-----------|-----------|-----------|-----------|-----------|
| $lRMSD_{20}$         | PEP-Cyclizer | 0.32±0.19 | 0.51±0.22 | 0.66±0.28 | 0.77±0.35 | 0.92±0.44 | 1.11±0.49 |
|                      | Rosetta NGK  | 0.26±0.33 | 0.38±0.36 | 0.52±0.43 | 0.66±0.48 | 0.83±0.54 | 1.04±0.66 |
| $gRMSD_{20}$         | PEP-Cyclizer | 1.38±0.57 | 1.45±0.50 | 1.52±0.59 | 1.64±0.78 | 2.02±1.25 | 2.55±1.70 |
|                      | Rosetta NGK  | 0.73±0.78 | 0.84±0.70 | 0.97±0.68 | 1.15±0.81 | 1.60±1.51 | 1.93±1.74 |
| $lRMSD_1$            | PEP-Cyclizer | 0.64±0.29 | 0.94±0.39 | 1.14±0.50 | 1.21±0.57 | 1.43±0.67 | 1.79±0.80 |
|                      | Rosetta NGK  | 0.34±0.35 | 0.55±0.53 | 0.73±0.61 | 0.89±0.63 | 1.12±0.72 | 1.35±0.80 |
| $gRMSD_1$            | PEP-Cyclizer | 2.67±1.40 | 2.80±1.47 | 3.06±1.85 | 3.06±2.18 | 3.99±2.67 | 4.90±3.14 |
|                      | Rosetta NGK  | 0.89±0.89 | 1.14±0.99 | 1.44±1.47 | 1.68±1.74 | 2.18±1.87 | 2.65±2.25 |

Table S3: **RMSD and ranks over the CyBase test set.** For every case the best RMSD out of top 20 and the top 1 were considered. The average and standard deviations of best local ( $lRMSD_{20}$ ,  $lRMSD_1$ ) and global ( $gRMSD_{20}$ ,  $gRMSD_1$ ) RMSD values are reported for every gap size.

Table S4: **Summary of cyclic linkers for conotoxins.** Data is collected from [56] and additional details are added from the mentioned references. The last column reports the pdb code of the available engineered cyclic peptides. linkers sequences in bold correspond to the functional variants that were considered in this study.

| name                      | linear peptide | linker                       | activity         | structure   | stability         | pdb code    |
|---------------------------|----------------|------------------------------|------------------|-------------|-------------------|-------------|
| $\alpha$ -Conotoxin MII   | 1m2c (1mii)    | GGAAG (cMII-5) [32]          | not active       | not similar | -                 | -           |
|                           |                | <b>GGAAGG</b> (cMII-6) [32]  | similar          | similar     | improved          | <b>2ajw</b> |
|                           |                | <b>GAGGAAG</b> (cMII-7) [32] | similar          | similar     | improved          | <b>2ak0</b> |
| $\alpha$ -Conotoxin ImI   | 1cnl           | A [33]                       | -                | -           | slightly improved | -           |
|                           |                | $\beta$ A [33]               | -                | -           | improved          | -           |
|                           |                | AG [33]                      | -                | -           | slightly improved | -           |
|                           |                | AGG [33]                     | -                | -           | slightly improved | -           |
| $\alpha$ -Conotoxin Vc1.1 | 2h8s           | GGAAG [34]                   | substantial loss | similar     | -                 | -           |
|                           |                | <b>GGAAGG</b> [34]           | similar/higher   | similar     | improved          | <b>4ttl</b> |
| $\alpha$ -Conotoxin RgIA  | 2JUT           | GAA [35]                     | reduced          | not similar | -                 | -           |
|                           |                | GAAG [35]                    | reduced          | not similar | -                 | -           |
|                           |                | GAAGG [35]                   | reduced          | similar     | -                 | -           |
|                           |                | <b>GGAAGG</b> [35]           | similar          | similar     | improved          | -           |
|                           |                | <b>GGAAGAG</b> [35]          | similar          | similar     | improved          | -           |
| $\alpha$ -Conotoxin AuIB  | 1mxn<br>1m xp  | A [36]                       | reduced          | -           | -                 | -           |
|                           |                | <b>AG</b> [36]               | reduced          | -           | improved          | -           |
|                           |                | AGG [36]                     | reduced          | -           | improved          | -           |
|                           |                | <b>AGGG</b> [36]             | reduced          | -           | improved          | -           |
|                           |                | GGAAG [36]                   | reduced          | -           | improved          | -           |
|                           |                | GAGAAG [36]                  | reduced          | -           | improved          | -           |
|                           |                | GGAGGAG [36]                 | reduced          | -           | improved          | -           |
|                           |                | <b>GGAA</b> [37]             | reduced          | similar     | improved          | -           |
|                           |                | AGAGA [37]                   | reduced          | similar     | improved          | -           |
|                           |                | GGAAGG [37]                  | reduced          | similar     | improved          | -           |
| GGAAAGG [37]              | reduced        | -                            | improved         | -           |                   |             |
| $\chi$ -Conotoxin MrIA    | 2ew4           | <b>AG</b> [38]               | similar          | similar     | improved          | 2j15        |
|                           |                | <b>RGD</b> [39]              | similar          | similar     | improved          | -           |
| $\omega$ -Conotoxin MVIIA | 1mvi           | <b>GGPG</b> [40]             | -                | -           | -                 | -           |
| Conotoxin gm9a            | 1ixt           | <b>GLP</b> [41]              | -                | similar     | similar           | 2ms0        |
| Conotoxin bru9a           | -              | <b>GLP</b> [41]              | -                | -           | similar           | 2msq        |



Table S5: Average ranks of the cyclic linkers for conotoxins, using forward-backtrack algorithm.

| name                      | linear peptide | linker                  | ranks  |
|---------------------------|----------------|-------------------------|--------|
| $\alpha$ -Conotoxin MII   | 1m2c (1mii)    | GGAAG (cMII-5)          | 19/32  |
|                           |                | <b>GGAAGG</b> (cMII-6)  | 40/64  |
|                           |                | <b>GAGGAAG</b> (cMII-7) | 8/128  |
| $\alpha$ -Conotoxin ImI   | 1cnl           | A                       | -      |
|                           |                | $\beta$ A               | -      |
|                           |                | AG                      | 2/4    |
|                           |                | AGG                     | 3/8    |
| $\alpha$ -Conotoxin Vc1.1 | 2h8s           | GGAAG                   | 23/32  |
|                           |                | <b>GGAAGG</b>           | 33/64  |
| $\alpha$ -Conotoxin RgIA  | 2JUT           | GAA                     | 8/8    |
|                           |                | GAAG                    | 14/16  |
|                           |                | GAAGG                   | 28/32  |
|                           |                | <b>GGAAGG</b>           | 24/64  |
|                           |                | <b>GGAAGAG</b>          | 21/128 |
| $\alpha$ -Conotoxin AuIB  | 1mxn<br>1m xp  | A                       | -      |
|                           |                | <b>AG</b>               | 1/4    |
|                           |                | AGG                     | 2/8    |
|                           |                | <b>AGGG</b>             | 6/16   |
|                           |                | GGAAG                   | 25/32  |
|                           |                | GAGAAG                  | 24/64  |
|                           |                | GGAGGAG                 | 8/128  |
|                           |                | <b>GGAA</b>             | 14/16  |
|                           |                | AGAGA                   | 3/32   |
|                           |                | GGAAGG                  | 37/64  |
| GGAAAGG                   | 35/128         |                         |        |
| $\chi$ -Conotoxin MrIA    | 2ew4           | <b>AG</b>               | 2/4    |
|                           |                | <b>RGD</b>              | 7/27   |
| $\omega$ -Conotoxin MVIIA | 1mvi           | <b>GGPG</b>             | 3/16   |
| Conotoxin gm9a            | 1ixt           | <b>GLP</b>              | 8/27   |
| Conotoxin bru9a           | -              | <b>GLP</b>              | -      |

Table S6: The RMSD between the 7 UII models generated by MD (M1-M7) and 5 UII models generated by PEP-FOLD (M1-M5), used as input to PEP-Cyclizer.

|          |    |      |      |      |      |      |      |      |      |      |      |      |      |
|----------|----|------|------|------|------|------|------|------|------|------|------|------|------|
| MD       | M1 |      |      |      |      |      |      |      |      |      |      |      |      |
|          | M2 | 1.07 |      |      |      |      |      |      |      |      |      |      |      |
|          | M3 | 1.10 | 0.93 |      |      |      |      |      |      |      |      |      |      |
|          | M4 | 3.20 | 3.34 | 3.15 |      |      |      |      |      |      |      |      |      |
|          | M5 | 2.64 | 2.91 | 2.59 | 1.04 |      |      |      |      |      |      |      |      |
|          | M6 | 2.23 | 2.52 | 2.25 | 1.45 | 0.77 |      |      |      |      |      |      |      |
|          | M7 | 2.49 | 2.70 | 2.43 | 1.38 | 1.00 | 1.15 |      |      |      |      |      |      |
|          | M8 | 2.53 | 2.81 | 2.50 | 1.70 | 1.22 | 1.26 | 0.83 | M8   |      |      |      |      |
| PEP-FOLD | M1 | 1.98 | 2.34 | 2.03 | 1.96 | 1.36 | 1.16 | 1.45 | 1.69 | M1   |      |      |      |
|          | M2 | 1.92 | 2.18 | 2.16 | 3.42 | 2.85 | 2.53 | 2.93 | 2.86 | 2.47 | M2   |      |      |
|          | M3 | 1.79 | 2.16 | 1.97 | 2.98 | 2.27 | 2.00 | 2.49 | 2.38 | 1.87 | 1.70 | M3   |      |
|          | M4 | 2.32 | 2.52 | 2.64 | 3.44 | 3.11 | 2.78 | 2.65 | 2.73 | 2.79 | 2.67 | 2.99 | M4   |
|          | M5 | 2.07 | 2.51 | 2.49 | 4.12 | 3.44 | 3.09 | 3.35 | 3.36 | 2.97 | 2.12 | 2.30 | 2.50 |
